# Supplementary material for: Atomically Precise Enantiopure Bimetallic Janus Clusters
Source: PubMed Central journal article supplement (PMC9523771; doi:10.1021/acscentsci.2c00754), 2022-09-07

## checkCIF/PLATON report

You have not supplied any structure factors. As a result the full set of tests cannot be run.

THIS REPORT IS FOR GUIDANCE ONLY. IF USED AS PART OF A REVIEW PROCEDURE FOR PUBLICATION, IT SHOULD NOT REPLACE THE EXPERTISE OF AN EXPERIENCED CRYSTALLOGRAPHIC REFEREE.

No syntax errors found.      CIF dictionary      Interpreting this report

### Datablock: rac-cu4au8

---

|                        |                                                    |                                          |               |
|------------------------|----------------------------------------------------|------------------------------------------|---------------|
| Bond precision:        | C-C = 0.0267 A                                     | Wavelength=1.54184                       |               |
| Cell:                  | a=17.2705 (1)                                      | b=16.4232 (1)                            | c=22.2882 (1) |
|                        | alpha=90                                           | beta=99.2500                             | gamma=90      |
| Temperature:           | 200 K                                              |                                          |               |
|                        | Calculated                                         | Reported                                 |               |
| Volume                 | 6239.55 (6)                                        | 6239.57 (6)                              |               |
| Space group            | P n                                                | P 1 n 1                                  |               |
| Hall group             | P -2yac                                            | P -2yac                                  |               |
| Moiety formula         | 2(C120 H90 Au8 Cu4 N6 P6 S6), C H2 Cl2 [+ solvent] | C120 H90 Au8 Cu4 N6 P6 S6, 0.5(C H2 Cl2) |               |
| Sum formula            | C241 H182 Au16 Cl2 Cu8 N12 P12 S12 [+ solvent]     | C120.50 H91 Au8 Cl Cu4 N6 P6 S6          |               |
| Mr                     | 7733.18                                            | 3866.51                                  |               |
| Dx, g cm <sup>-3</sup> | 2.058                                              | 2.058                                    |               |
| Z                      | 1                                                  | 2                                        |               |
| Mu (mm <sup>-1</sup> ) | 20.141                                             | 20.141                                   |               |
| F000                   | 3614.0                                             | 3614.0                                   |               |
| F000'                  | 3542.16                                            |                                          |               |
| h, k, lmax             | 21, 20, 27                                         | 21, 20, 27                               |               |
| Nref                   | 25400 [ 12710]                                     | 19719                                    |               |
| Tmin, Tmax             | 0.122, 0.133                                       | 0.875, 1.000                             |               |
| Tmin'                  | 0.019                                              |                                          |               |

Correction method= # Reported T Limits: Tmin=0.875 Tmax=1.000

AbsCorr = MULTI-SCAN

Data completeness= 1.55/0.78

Theta(max)= 74.109

R(reflections)= 0.0351( 18944)

wR2(reflections)=  
0.0911( 19719)

S = 1.073

Npar= 1552

---

The following ALERTS were generated. Each ALERT has the format

**test-name\_ALERT\_alert-type\_alert-level.**

Click on the hyperlinks for more details of the test.

---

**Alert level B**

PLAT342\_ALERT\_3\_B Low Bond Precision on C-C Bonds ..... 0.02674 Ang.

---

**Alert level C**

|                   |                                        |              |                                 |       |       |       |
|-------------------|----------------------------------------|--------------|---------------------------------|-------|-------|-------|
| PLAT220_ALERT_2_C | NonSolvent                             | Resd 1 C     | Ueq(max)/Ueq(min)               | Range | 3.8   | Ratio |
| PLAT234_ALERT_4_C | Large Hirshfeld Difference             | P1           | --C13                           | .     | 0.16  | Ang.  |
| PLAT234_ALERT_4_C | Large Hirshfeld Difference             | P1           | --C25                           | .     | 0.16  | Ang.  |
| PLAT234_ALERT_4_C | Large Hirshfeld Difference             | P5           | --C91A                          | .     | 0.18  | Ang.  |
| PLAT234_ALERT_4_C | Large Hirshfeld Difference             | C5           | --C6                            | .     | 0.22  | Ang.  |
| PLAT234_ALERT_4_C | Large Hirshfeld Difference             | C69          | --C70                           | .     | 0.24  | Ang.  |
| PLAT241_ALERT_2_C | High                                   | 'MainMol'    | Ueq as Compared to Neighbors of |       | C22   | Check |
| PLAT241_ALERT_2_C | High                                   | 'MainMol'    | Ueq as Compared to Neighbors of |       | C35   | Check |
| PLAT241_ALERT_2_C | High                                   | 'MainMol'    | Ueq as Compared to Neighbors of |       | C41   | Check |
| PLAT241_ALERT_2_C | High                                   | 'MainMol'    | Ueq as Compared to Neighbors of |       | C63   | Check |
| PLAT241_ALERT_2_C | High                                   | 'MainMol'    | Ueq as Compared to Neighbors of |       | C69   | Check |
| PLAT241_ALERT_2_C | High                                   | 'MainMol'    | Ueq as Compared to Neighbors of |       | C107  | Check |
| PLAT242_ALERT_2_C | Low                                    | 'MainMol'    | Ueq as Compared to Neighbors of |       | C37   | Check |
| PLAT260_ALERT_2_C | Large Average Ueq of Residue Including |              |                                 | C11   | 0.143 | Check |
| PLAT721_ALERT_1_C | Bond Calc                              | 1.41(5), Rep | 1.39000 Dev...                  |       | 0.02  | Ang.  |
|                   | C88A                                   | -C87A        | 1_555 1_555 .....               | #     | 256   | Check |

---

**Alert level G**

|                   |                                                  |                    |   |  |         |              |
|-------------------|--------------------------------------------------|--------------------|---|--|---------|--------------|
| PLAT002_ALERT_2_G | Number of Distance or Angle Restraints on AtSite |                    |   |  | 16      | Note         |
| PLAT003_ALERT_2_G | Number of Uiso or Uij Restrained non-H Atoms ... |                    |   |  | 73      | Report       |
| PLAT042_ALERT_1_G | Calc. and Reported Moiety Formula Strings Differ |                    |   |  |         | Please Check |
| PLAT045_ALERT_1_G | Calculated and Reported Z Differ by a Factor ... |                    |   |  | 0.5000  | Check        |
| PLAT083_ALERT_2_G | SHELXL Second Parameter in WGHT Unusually Large  |                    |   |  | 20.64   | Why ?        |
| PLAT142_ALERT_4_G | s.u. on b - Axis Small or Missing .....          |                    |   |  | 0.00010 | Ang.         |
| PLAT143_ALERT_4_G | s.u. on c - Axis Small or Missing .....          |                    |   |  | 0.00010 | Ang.         |
| PLAT145_ALERT_4_G | s.u. on beta Small or Missing .....              |                    |   |  | 0.0000  | Degree       |
| PLAT172_ALERT_4_G | The CIF-Embedded .res File Contains DFIX Records |                    |   |  | 6       | Report       |
| PLAT177_ALERT_4_G | The CIF-Embedded .res File Contains DELU Records |                    |   |  | 2       | Report       |
| PLAT186_ALERT_4_G | The CIF-Embedded .res File Contains ISOR Records |                    |   |  | 5       | Report       |
| PLAT232_ALERT_2_G | Hirshfeld Test Diff (M-X) Cu2                    | --S3               | . |  | 5.5     | s.u.         |
| PLAT300_ALERT_4_G | Atom Site Occupancy of C11                       | Constrained at     |   |  | 0.5     | Check        |
| PLAT300_ALERT_4_G | Atom Site Occupancy of C12                       | Constrained at     |   |  | 0.5     | Check        |
| PLAT300_ALERT_4_G | Atom Site Occupancy of COAA                      | Constrained at     |   |  | 0.5     | Check        |
| PLAT300_ALERT_4_G | Atom Site Occupancy of HOAA                      | Constrained at     |   |  | 0.5     | Check        |
| PLAT300_ALERT_4_G | Atom Site Occupancy of HOAB                      | Constrained at     |   |  | 0.5     | Check        |
| PLAT301_ALERT_3_G | Main Residue Disorder .....                      | (Resd 1 )          |   |  | 21%     | Note         |
| PLAT302_ALERT_4_G | Anion/Solvent/Minor-Residue Disorder (Resd 2 )   |                    |   |  | 100%    | Note         |
| PLAT304_ALERT_4_G | Non-Integer Number of Atoms in .....             | (Resd 2 )          |   |  | 2.50    | Check        |
| PLAT432_ALERT_2_G | Short Inter X...Y Contact C12                    | ..C1A              | . |  | 3.21    | Ang.         |
|                   |                                                  | 1/2+x, -y, 1/2+z = |   |  | 2_555   | Check        |

```

PLAT606_ALERT_4_G Solvent Accessible VOID(S) in Structure ..... ! Info
PLAT720_ALERT_4_G Number of Unusual/Non-Standard Labels ..... 3 Note
PLAT722_ALERT_1_G Angle Calc 117.00, Rep 118.10 Dev... 1.10 Degree
      C90 -C89 -H89 1_555 1_555 1_555 # 595 Check
PLAT794_ALERT_5_G Tentative Bond Valency for Cu3 (I) . 1.04 Info
PLAT860_ALERT_3_G Number of Least-Squares Restraints ..... 476 Note
PLAT883_ALERT_1_G No Info/Value for _atom_sites_solution_primary . Please Do !

```

---

```

0 ALERT level A = Most likely a serious problem - resolve or explain
1 ALERT level B = A potentially serious problem, consider carefully
15 ALERT level C = Check. Ensure it is not caused by an omission or oversight
27 ALERT level G = General information/check it is not something unexpected

5 ALERT type 1 CIF construction/syntax error, inconsistent or missing data
14 ALERT type 2 Indicator that the structure model may be wrong or deficient
3 ALERT type 3 Indicator that the structure quality may be low
20 ALERT type 4 Improvement, methodology, query or suggestion
1 ALERT type 5 Informative message, check

```

---

It is advisable to attempt to resolve as many as possible of the alerts in all categories. Often the minor alerts point to easily fixed oversights, errors and omissions in your CIF or refinement strategy, so attention to these fine details can be worthwhile. In order to resolve some of the more serious problems it may be necessary to carry out additional measurements or structure refinements. However, the purpose of your study may justify the reported deviations and the more serious of these should normally be commented upon in the discussion or experimental section of a paper or in the "special\_details" fields of the CIF. checkCIF was carefully designed to identify outliers and unusual parameters, but every test has its limitations and alerts that are not important in a particular case may appear. Conversely, the absence of alerts does not guarantee there are no aspects of the results needing attention. It is up to the individual to critically assess their own results and, if necessary, seek expert advice.

### Publication of your CIF in IUCr journals

A basic structural check has been run on your CIF. These basic checks will be run on all CIFs submitted for publication in IUCr journals (*Acta Crystallographica*, *Journal of Applied Crystallography*, *Journal of Synchrotron Radiation*); however, if you intend to submit to *Acta Crystallographica Section C* or *E* or *IUCrData*, you should make sure that full publication checks are run on the final version of your CIF prior to submission.

### Publication of your CIF in other journals

Please refer to the *Notes for Authors* of the relevant journal for any special instructions relating to CIF submission.

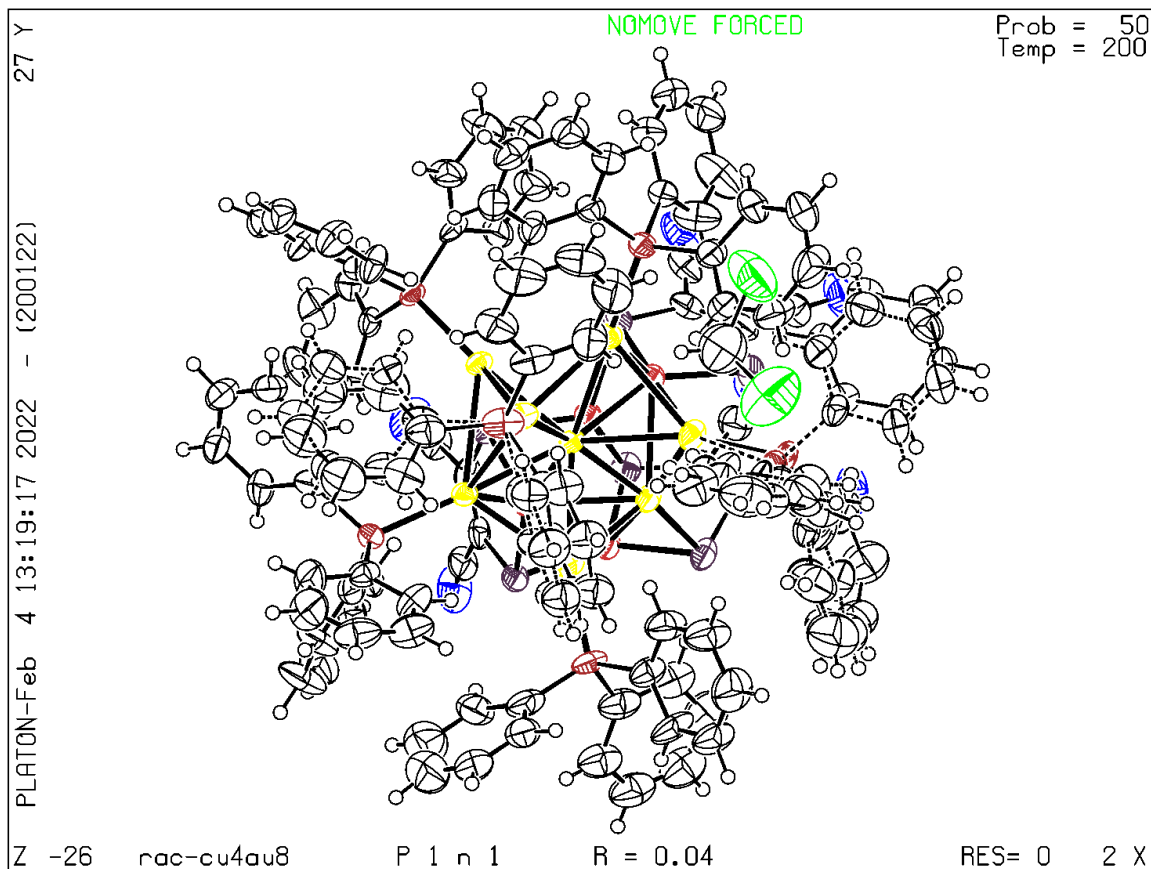

Supplement: oc2c00754_si_006.pdf [file oc2c00754_si_006.pdf]
