# Supplementary material for: Atomically Precise Enantiopure Bimetallic Janus Clusters
Source: PubMed Central journal article supplement (PMC9523771; doi:10.1021/acscentsci.2c00754), 2022-09-07

## checkCIF/PLATON report

Structure factors have been supplied for datablock(s) r-cu4au8

THIS REPORT IS FOR GUIDANCE ONLY. IF USED AS PART OF A REVIEW PROCEDURE FOR PUBLICATION, IT SHOULD NOT REPLACE THE EXPERTISE OF AN EXPERIENCED CRYSTALLOGRAPHIC REFEREE.

No syntax errors found.      CIF dictionary      Interpreting this report

### Datablock: r-cu4au8

---

|                        |                                                       |                                           |                           |
|------------------------|-------------------------------------------------------|-------------------------------------------|---------------------------|
| Bond precision:        | C-C = 0.0299 A                                        | Wavelength=1.54184                        |                           |
| Cell:                  | a=16.5742 (1)<br>alpha=90                             | b=26.8134 (1)<br>beta=91.417 (1)          | c=31.7444 (1)<br>gamma=90 |
| Temperature:           | 100 K                                                 |                                           |                           |
|                        | Calculated                                            | Reported                                  |                           |
| Volume                 | 14103.24 (11)                                         | 14103.24 (11)                             |                           |
| Space group            | P 21                                                  | P 1 21 1                                  |                           |
| Hall group             | P 2yb                                                 | P 2yb                                     |                           |
| Moiety formula         | 2(C144 H96 Au8 Cu4 N6 P6 S6), 3(C H2 Cl2) [+ solvent] | 2(C144 H96 Au8 Cu4 N6 P6 S6), 3(C H2 Cl2) |                           |
| Sum formula            | C291 H198 Au16 Cl6 Cu8 N12 P12 S12 [+ solvent]        | C291 H198 Au16 Cl6 Cu8 N12 P12 S12        |                           |
| Mr                     | 8491.60                                               | 8491.45                                   |                           |
| Dx, g cm <sup>-3</sup> | 2.000                                                 | 2.000                                     |                           |
| Z                      | 2                                                     | 2                                         |                           |
| Mu (mm <sup>-1</sup> ) | 18.239                                                | 18.239                                    |                           |
| F000                   | 7996.0                                                | 7996.0                                    |                           |
| F000'                  | 7856.67                                               |                                           |                           |
| h, k, lmax             | 20, 33, 39                                            | 20, 33, 39                                |                           |
| Nref                   | 57083 [ 29182]                                        | 54572                                     |                           |
| Tmin, Tmax             | 0.065, 0.112                                          | 0.259, 1.000                              |                           |
| Tmin'                  | 0.010                                                 |                                           |                           |

Correction method= # Reported T Limits: Tmin=0.259 Tmax=1.000  
AbsCorr = MULTII-SCAN

Data completeness= 1.87/0.96

Theta(max)= 73.775

R(reflections)= 0.0519( 51759)

wR2(reflections)=  
0.1416( 54572)

S = 1.051

Npar= 3190

---

The following ALERTS were generated. Each ALERT has the format  
**test-name\_ALERT\_alert-type\_alert-level.**  
Click on the hyperlinks for more details of the test.

---

### Alert level B

PLAT342\_ALERT\_3\_B Low Bond Precision on C-C Bonds ..... 0.02986 Ang.

---

### Alert level C

PLAT213\_ALERT\_2\_C Atom C8 has ADP max/min Ratio ..... 3.1 oblate  
PLAT213\_ALERT\_2\_C Atom P8 has ADP max/min Ratio ..... 3.3 oblate  
PLAT213\_ALERT\_2\_C Atom C185 has ADP max/min Ratio ..... 3.6 oblate  
PLAT220\_ALERT\_2\_C NonSolvent Resd 1 C Ueq(max)/Ueq(min) Range 3.3 Ratio  
PLAT220\_ALERT\_2\_C NonSolvent Resd 2 C Ueq(max)/Ueq(min) Range 3.6 Ratio  
PLAT241\_ALERT\_2\_C High 'MainMol' Ueq as Compared to Neighbors of C23 Check  
PLAT241\_ALERT\_2\_C High 'MainMol' Ueq as Compared to Neighbors of C217 Check  
PLAT241\_ALERT\_2\_C High 'MainMol' Ueq as Compared to Neighbors of C237 Check  
PLAT241\_ALERT\_2\_C High 'MainMol' Ueq as Compared to Neighbors of C239 Check  
PLAT242\_ALERT\_2\_C Low 'MainMol' Ueq as Compared to Neighbors of C1 Check  
PLAT242\_ALERT\_2\_C Low 'MainMol' Ueq as Compared to Neighbors of C238 Check  
PLAT244\_ALERT\_4\_C Low 'Solvent' Ueq as Compared to Neighbors of C1AA Check  
PLAT244\_ALERT\_4\_C Low 'Solvent' Ueq as Compared to Neighbors of C0A0 Check  
PLAT260\_ALERT\_2\_C Large Average Ueq of Residue Including C11 0.157 Check  
PLAT260\_ALERT\_2\_C Large Average Ueq of Residue Including C101 0.120 Check  
PLAT260\_ALERT\_2\_C Large Average Ueq of Residue Including C10A 0.134 Check  
PLAT331\_ALERT\_2\_C Small Aver Phenyl C-C Dist C163 --C168 . 1.37 Ang.  
PLAT332\_ALERT\_2\_C Large Phenyl C-C Range C083 -C205 . 0.18 Ang.  
PLAT334\_ALERT\_2\_C Small Aver. Benzene C-C Dist C28 -C33 . 1.37 Ang.  
PLAT369\_ALERT\_2\_C Long C(sp2)-C(sp2) Bond C78 - C79 . 1.53 Ang.  
PLAT790\_ALERT\_4\_C Centre of Gravity not Within Unit Cell: Resd. # 1 Note  
C144 H96 Au8 Cu4 N6 P6 S6  
PLAT911\_ALERT\_3\_C Missing FCF Refl Between Thmin & STh/L= 0.600 91 Report  
PLAT977\_ALERT\_2\_C Check Negative Difference Density on H0AD . -0.36 eA-3  
PLAT977\_ALERT\_2\_C Check Negative Difference Density on H18 . -0.53 eA-3  
PLAT977\_ALERT\_2\_C Check Negative Difference Density on H87 . -0.38 eA-3  
PLAT977\_ALERT\_2\_C Check Negative Difference Density on H89 . -0.37 eA-3  
PLAT977\_ALERT\_2\_C Check Negative Difference Density on H103 . -0.54 eA-3  
PLAT977\_ALERT\_2\_C Check Negative Difference Density on H108 . -0.37 eA-3  
PLAT977\_ALERT\_2\_C Check Negative Difference Density on H118 . -0.48 eA-3  
PLAT977\_ALERT\_2\_C Check Negative Difference Density on H211 . -0.36 eA-3  
PLAT977\_ALERT\_2\_C Check Negative Difference Density on H258 . -0.32 eA-3  
PLAT977\_ALERT\_2\_C Check Negative Difference Density on H269 . -0.31 eA-3  
PLAT977\_ALERT\_2\_C Check Negative Difference Density on H286 . -0.42 eA-3

---

### Alert level G

PLAT002\_ALERT\_2\_G Number of Distance or Angle Restraints on AtSite 6 Note  
PLAT003\_ALERT\_2\_G Number of Uiso or Uij Restrained non-H Atoms ... 47 Report  
PLAT083\_ALERT\_2\_G SHELXL Second Parameter in WGHT Unusually Large 62.12 Why ?  
PLAT142\_ALERT\_4\_G s.u. on b - Axis Small or Missing ..... 0.00010 Ang.

|                   |                                                  |         |        |
|-------------------|--------------------------------------------------|---------|--------|
| PLAT143_ALERT_4_G | s.u. on c - Axis Small or Missing .....          | 0.00010 | Ang.   |
| PLAT153_ALERT_1_G | The s.u.'s on the Cell Axes are Equal ..(Note)   | 0.0001  | Ang.   |
| PLAT172_ALERT_4_G | The CIF-Embedded .res File Contains DFIX Records | 1       | Report |
| PLAT177_ALERT_4_G | The CIF-Embedded .res File Contains DELU Records | 2       | Report |
| PLAT178_ALERT_4_G | The CIF-Embedded .res File Contains SIMU Records | 2       | Report |
| PLAT186_ALERT_4_G | The CIF-Embedded .res File Contains ISOR Records | 14      | Report |
| PLAT333_ALERT_2_G | Large Aver C6-Ring C-C Dist C212 -C221 .         | 1.43    | Ang.   |
| PLAT333_ALERT_2_G | Large Aver C6-Ring C-C Dist C222 -C231 .         | 1.42    | Ang.   |
| PLAT333_ALERT_2_G | Large Aver C6-Ring C-C Dist C256 -C265 .         | 1.42    | Ang.   |
| PLAT606_ALERT_4_G | Solvent Accessible VOID(S) in Structure .....    | !       | Info   |
| PLAT720_ALERT_4_G | Number of Unusual/Non-Standard Labels .....      | 13      | Note   |
| PLAT790_ALERT_4_G | Centre of Gravity not Within Unit Cell: Resd. #  | 2       | Note   |
|                   | C144 H96 Au8 Cu4 N6 P6 S6                        |         |        |
| PLAT790_ALERT_4_G | Centre of Gravity not Within Unit Cell: Resd. #  | 4       | Note   |
|                   | C H2 C12                                         |         |        |
| PLAT791_ALERT_4_G | Model has Chirality at P1 (Sohnke SpGr)          | R       | Verify |
| PLAT791_ALERT_4_G | Model has Chirality at P4 (Sohnke SpGr)          | R       | Verify |
| PLAT794_ALERT_5_G | Tentative Bond Valency for Cu3 (I) .             | 1.02    | Info   |
| PLAT860_ALERT_3_G | Number of Least-Squares Restraints .....         | 319     | Note   |
| PLAT883_ALERT_1_G | No Info/Value for _atom_sites_solution_primary . | Please  | Do !   |
| PLAT910_ALERT_3_G | Missing # of FCF Reflection(s) Below Theta(Min). | 3       | Note   |
| PLAT912_ALERT_4_G | Missing # of FCF Reflections Above STh/L= 0.600  | 425     | Note   |
| PLAT933_ALERT_2_G | Number of HKL-OMIT Records in Embedded .res File | 21      | Note   |
| PLAT978_ALERT_2_G | Number C-C Bonds with Positive Residual Density. | 0       | Info   |

---

0 **ALERT level A** = Most likely a serious problem - resolve or explain  
1 **ALERT level B** = A potentially serious problem, consider carefully  
33 **ALERT level C** = Check. Ensure it is not caused by an omission or oversight  
26 **ALERT level G** = General information/check it is not something unexpected

2 ALERT type 1 CIF construction/syntax error, inconsistent or missing data  
37 ALERT type 2 Indicator that the structure model may be wrong or deficient  
4 ALERT type 3 Indicator that the structure quality may be low  
16 ALERT type 4 Improvement, methodology, query or suggestion  
1 ALERT type 5 Informative message, check

---

It is advisable to attempt to resolve as many as possible of the alerts in all categories. Often the minor alerts point to easily fixed oversights, errors and omissions in your CIF or refinement strategy, so attention to these fine details can be worthwhile. In order to resolve some of the more serious problems it may be necessary to carry out additional measurements or structure refinements. However, the purpose of your study may justify the reported deviations and the more serious of these should normally be commented upon in the discussion or experimental section of a paper or in the "special\_details" fields of the CIF. checkCIF was carefully designed to identify outliers and unusual parameters, but every test has its limitations and alerts that are not important in a particular case may appear. Conversely, the absence of alerts does not guarantee there are no aspects of the results needing attention. It is up to the individual to critically assess their own results and, if necessary, seek expert advice.

### **Publication of your CIF in IUCr journals**

A basic structural check has been run on your CIF. These basic checks will be run on all CIFs submitted for publication in IUCr journals (*Acta Crystallographica*, *Journal of Applied Crystallography*, *Journal of Synchrotron Radiation*); however, if you intend to submit to *Acta Crystallographica Section C* or *E* or *IUCrData*, you should make sure that full publication checks are run on the final version of your CIF prior to submission.

### **Publication of your CIF in other journals**

Please refer to the *Notes for Authors* of the relevant journal for any special instructions relating to CIF submission.

---

**PLATON version of 20/01/2022; check.def file version of 19/01/2022**

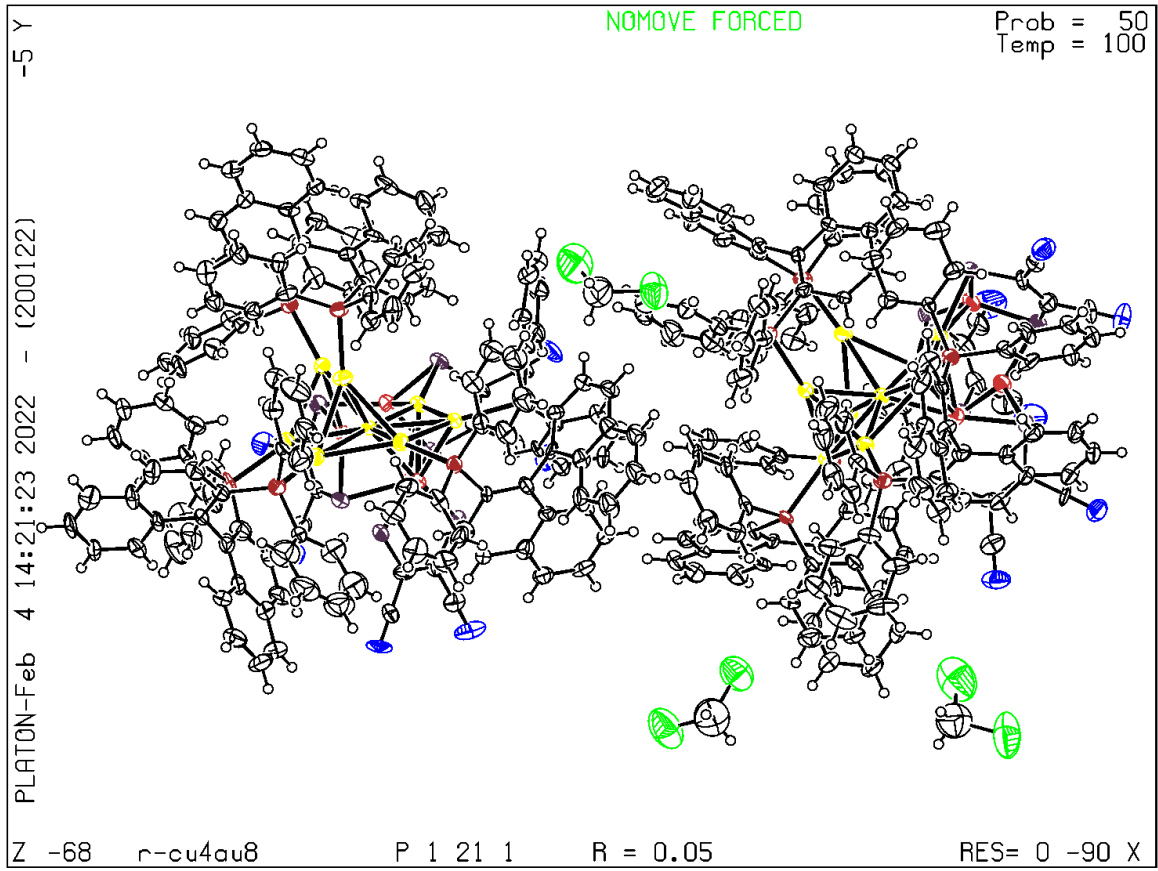

Supplement: oc2c00754_si_007.pdf [file oc2c00754_si_007.pdf]
