# Supplementary material for: Atomically Precise Enantiopure Bimetallic Janus Clusters
Source: PubMed Central journal article supplement (PMC9523771; doi:10.1021/acscentsci.2c00754), 2022-09-07

## checkCIF/PLATON report

Structure factors have been supplied for datablock(s) s-cu4au8

THIS REPORT IS FOR GUIDANCE ONLY. IF USED AS PART OF A REVIEW PROCEDURE FOR PUBLICATION, IT SHOULD NOT REPLACE THE EXPERTISE OF AN EXPERIENCED CRYSTALLOGRAPHIC REFEREE.

No syntax errors found.      CIF dictionary      Interpreting this report

### Datablock: s-cu4au8

---

|                        |                                          |                                  |                           |
|------------------------|------------------------------------------|----------------------------------|---------------------------|
| Bond precision:        | C-C = 0.0580 A                           | Wavelength=1.54184               |                           |
| Cell:                  | a=16.6336 (2)<br>alpha=90                | b=26.8950 (3)<br>beta=91.346 (1) | c=31.7629 (4)<br>gamma=90 |
| Temperature:           | 200 K                                    |                                  |                           |
|                        | Calculated                               | Reported                         |                           |
| Volume                 | 14205.6 (3)                              | 14205.6 (3)                      |                           |
| Space group            | P 21                                     | P 1 21 1                         |                           |
| Hall group             | P 2yb                                    | P 2yb                            |                           |
| Moiety formula         | C144 H96 Au8 Cu4 N6 P6 S6<br>[+ solvent] | C144 H96 Au8 Cu4 N6 P6 S6        |                           |
| Sum formula            | C144 H96 Au8 Cu4 N6 P6 S6<br>[+ solvent] | C144 H96 Au8 Cu4 N6 P6 S6        |                           |
| Mr                     | 4118.41                                  | 4118.33                          |                           |
| Dx, g cm <sup>-3</sup> | 1.926                                    | 1.926                            |                           |
| Z                      | 4                                        | 4                                |                           |
| Mu (mm <sup>-1</sup> ) | 17.577                                   | 17.577                           |                           |
| F000                   | 7744.0                                   | 7744.0                           |                           |
| F000'                  | 7600.06                                  |                                  |                           |
| h, k, lmax             | 20, 33, 39                               | 20, 33, 39                       |                           |
| Nref                   | 57792 [ 29541]                           | 53322                            |                           |
| Tmin, Tmax             | 0.119, 0.121                             | 0.531, 1.000                     |                           |
| Tmin'                  | 0.020                                    |                                  |                           |

Correction method= # Reported T Limits: Tmin=0.531 Tmax=1.000

AbsCorr = MULTI-SCAN

Data completeness= 1.81/0.92

Theta (max)= 74.127

R(reflections)= 0.0808( 42412)

wR2(reflections)=  
0.2239( 53322)

S = 1.043

Npar= 3121

---

The following ALERTS were generated. Each ALERT has the format

**test-name\_ALERT\_alert-type\_alert-level.**

Click on the hyperlinks for more details of the test.

---

 **Alert level B**

PLAT342\_ALERT\_3\_B Low Bond Precision on C-C Bonds ..... 0.058 Ang.

---

 **Alert level C**

|                   |                                                  |       |        |
|-------------------|--------------------------------------------------|-------|--------|
| PLAT094_ALERT_2_C | Ratio of Maximum / Minimum Residual Density .... | 2.28  | Report |
| PLAT213_ALERT_2_C | Atom C222 has ADP max/min Ratio .....            | 3.9   | prolat |
| PLAT220_ALERT_2_C | NonSolvent Resd 1 C Ueq(max)/Ueq(min) Range      | 3.8   | Ratio  |
| PLAT220_ALERT_2_C | NonSolvent Resd 2 C Ueq(max)/Ueq(min) Range      | 3.1   | Ratio  |
| PLAT241_ALERT_2_C | High 'MainMol' Ueq as Compared to Neighbors of   | C31   | Check  |
| PLAT241_ALERT_2_C | High 'MainMol' Ueq as Compared to Neighbors of   | C54   | Check  |
| PLAT241_ALERT_2_C | High 'MainMol' Ueq as Compared to Neighbors of   | C61   | Check  |
| PLAT241_ALERT_2_C | High 'MainMol' Ueq as Compared to Neighbors of   | C86   | Check  |
| PLAT241_ALERT_2_C | High 'MainMol' Ueq as Compared to Neighbors of   | C88   | Check  |
| PLAT241_ALERT_2_C | High 'MainMol' Ueq as Compared to Neighbors of   | C102  | Check  |
| PLAT241_ALERT_2_C | High 'MainMol' Ueq as Compared to Neighbors of   | C118  | Check  |
| PLAT241_ALERT_2_C | High 'MainMol' Ueq as Compared to Neighbors of   | C141  | Check  |
| PLAT241_ALERT_2_C | High 'MainMol' Ueq as Compared to Neighbors of   | C161  | Check  |
| PLAT241_ALERT_2_C | High 'MainMol' Ueq as Compared to Neighbors of   | C167  | Check  |
| PLAT241_ALERT_2_C | High 'MainMol' Ueq as Compared to Neighbors of   | C207  | Check  |
| PLAT241_ALERT_2_C | High 'MainMol' Ueq as Compared to Neighbors of   | C210  | Check  |
| PLAT241_ALERT_2_C | High 'MainMol' Ueq as Compared to Neighbors of   | C215  | Check  |
| PLAT241_ALERT_2_C | High 'MainMol' Ueq as Compared to Neighbors of   | C240  | Check  |
| PLAT241_ALERT_2_C | High 'MainMol' Ueq as Compared to Neighbors of   | C241  | Check  |
| PLAT241_ALERT_2_C | High 'MainMol' Ueq as Compared to Neighbors of   | C247  | Check  |
| PLAT241_ALERT_2_C | High 'MainMol' Ueq as Compared to Neighbors of   | C249  | Check  |
| PLAT241_ALERT_2_C | High 'MainMol' Ueq as Compared to Neighbors of   | C254  | Check  |
| PLAT241_ALERT_2_C | High 'MainMol' Ueq as Compared to Neighbors of   | C287  | Check  |
| PLAT242_ALERT_2_C | Low 'MainMol' Ueq as Compared to Neighbors of    | C1    | Check  |
| PLAT242_ALERT_2_C | Low 'MainMol' Ueq as Compared to Neighbors of    | C3    | Check  |
| PLAT242_ALERT_2_C | Low 'MainMol' Ueq as Compared to Neighbors of    | C152  | Check  |
| PLAT242_ALERT_2_C | Low 'MainMol' Ueq as Compared to Neighbors of    | C162  | Check  |
| PLAT242_ALERT_2_C | Low 'MainMol' Ueq as Compared to Neighbors of    | C208  | Check  |
| PLAT242_ALERT_2_C | Low 'MainMol' Ueq as Compared to Neighbors of    | C211  | Check  |
| PLAT242_ALERT_2_C | Low 'MainMol' Ueq as Compared to Neighbors of    | C221  | Check  |
| PLAT242_ALERT_2_C | Low 'MainMol' Ueq as Compared to Neighbors of    | C239  | Check  |
| PLAT242_ALERT_2_C | Low 'MainMol' Ueq as Compared to Neighbors of    | C246  | Check  |
| PLAT331_ALERT_2_C | Small Aver Phenyl C-C Dist C201 --C206 .         | 1.37  | Ang.   |
| PLAT332_ALERT_2_C | Large Phenyl C-C Range C163 -C168 .              | 0.16  | Ang.   |
| PLAT332_ALERT_2_C | Large Phenyl C-C Range C189 -C194 .              | 0.18  | Ang.   |
| PLAT332_ALERT_2_C | Large Phenyl C-C Range C251 -C256 .              | 0.17  | Ang.   |
| PLAT911_ALERT_3_C | Missing FCF Refl Between Thmin & STh/L= 0.600    | 51    | Report |
| PLAT977_ALERT_2_C | Check Negative Difference Density on H22 .       | -0.37 | eA-3   |
| PLAT977_ALERT_2_C | Check Negative Difference Density on H27 .       | -0.33 | eA-3   |
| PLAT977_ALERT_2_C | Check Negative Difference Density on H30 .       | -0.45 | eA-3   |
| PLAT977_ALERT_2_C | Check Negative Difference Density on H37 .       | -0.34 | eA-3   |

|                   |                                           |   |            |
|-------------------|-------------------------------------------|---|------------|
| PLAT977_ALERT_2_C | Check Negative Difference Density on H64  | . | -0.43 eA-3 |
| PLAT977_ALERT_2_C | Check Negative Difference Density on H66  | . | -0.48 eA-3 |
| PLAT977_ALERT_2_C | Check Negative Difference Density on H74  | . | -0.31 eA-3 |
| PLAT977_ALERT_2_C | Check Negative Difference Density on H83  | . | -0.48 eA-3 |
| PLAT977_ALERT_2_C | Check Negative Difference Density on H84  | . | -0.41 eA-3 |
| PLAT977_ALERT_2_C | Check Negative Difference Density on H89  | . | -0.38 eA-3 |
| PLAT977_ALERT_2_C | Check Negative Difference Density on H111 | . | -0.31 eA-3 |
| PLAT977_ALERT_2_C | Check Negative Difference Density on H131 | . | -0.44 eA-3 |
| PLAT977_ALERT_2_C | Check Negative Difference Density on H158 | . | -0.49 eA-3 |
| PLAT977_ALERT_2_C | Check Negative Difference Density on H161 | . | -0.40 eA-3 |
| PLAT977_ALERT_2_C | Check Negative Difference Density on H170 | . | -0.59 eA-3 |
| PLAT977_ALERT_2_C | Check Negative Difference Density on H175 | . | -0.32 eA-3 |
| PLAT977_ALERT_2_C | Check Negative Difference Density on H176 | . | -0.33 eA-3 |
| PLAT977_ALERT_2_C | Check Negative Difference Density on H186 | . | -0.47 eA-3 |
| PLAT977_ALERT_2_C | Check Negative Difference Density on H187 | . | -0.43 eA-3 |
| PLAT977_ALERT_2_C | Check Negative Difference Density on H210 | . | -0.57 eA-3 |
| PLAT977_ALERT_2_C | Check Negative Difference Density on H211 | . | -0.32 eA-3 |
| PLAT977_ALERT_2_C | Check Negative Difference Density on H220 | . | -0.34 eA-3 |
| PLAT977_ALERT_2_C | Check Negative Difference Density on H225 | . | -0.33 eA-3 |
| PLAT977_ALERT_2_C | Check Negative Difference Density on H240 | . | -0.63 eA-3 |
| PLAT977_ALERT_2_C | Check Negative Difference Density on H259 | . | -0.33 eA-3 |
| PLAT977_ALERT_2_C | Check Negative Difference Density on H271 | . | -0.61 eA-3 |
| PLAT977_ALERT_2_C | Check Negative Difference Density on H286 | . | -0.34 eA-3 |

---

**Alert level G**

|                   |                                                  |       |        |        |
|-------------------|--------------------------------------------------|-------|--------|--------|
| PLAT002_ALERT_2_G | Number of Distance or Angle Restraints on AtSite |       | 52     | Note   |
| PLAT003_ALERT_2_G | Number of Uiso or Uij Restrained non-H Atoms ... |       | 98     | Report |
| PLAT072_ALERT_2_G | SHELXL First Parameter in WGHT Unusually Large   |       | 0.13   | Report |
| PLAT083_ALERT_2_G | SHELXL Second Parameter in WGHT Unusually Large  |       | 148.53 | Why ?  |
| PLAT172_ALERT_4_G | The CIF-Embedded .res File Contains DFIX Records |       | 11     | Report |
| PLAT177_ALERT_4_G | The CIF-Embedded .res File Contains DELU Records |       | 1      | Report |
| PLAT186_ALERT_4_G | The CIF-Embedded .res File Contains ISOR Records |       | 16     | Report |
| PLAT335_ALERT_2_G | Check Large C6 Ring C-C Range C69                | -C78  | 0.16   | Ang.   |
| PLAT335_ALERT_2_G | Check Large C6 Ring C-C Range C79                | -C88  | 0.16   | Ang.   |
| PLAT335_ALERT_2_G | Check Large C6 Ring C-C Range C267               | -C276 | 0.18   | Ang.   |
| PLAT606_ALERT_4_G | Solvent Accessible VOID(S) in Structure .....    |       | !      | Info   |
| PLAT722_ALERT_1_G | Angle Calc 121.00, Rep 119.80 Dev...             |       | 1.20   | Degree |
|                   | C199 -C198 -H198 1_555 1_555 1_555               | #     | 930    | Check  |
| PLAT722_ALERT_1_G | Angle Calc 117.00, Rep 118.40 Dev...             |       | 1.40   | Degree |
|                   | C256 -C255 -H255 1_555 1_555 1_555               | #     | 961    | Check  |
| PLAT722_ALERT_1_G | Angle Calc 123.00, Rep 124.10 Dev...             |       | 1.10   | Degree |
|                   | C144 -C143 -H143 1_555 1_555 1_555               | #     | 1275   | Check  |
| PLAT722_ALERT_1_G | Angle Calc 120.00, Rep 118.70 Dev...             |       | 1.30   | Degree |
|                   | C137 -C136 -H136 1_555 1_555 1_555               | #     | 1288   | Check  |
| PLAT794_ALERT_5_G | Tentative Bond Valency for Cu3 (I)               | .     | 1.00   | Info   |
| PLAT860_ALERT_3_G | Number of Least-Squares Restraints .....         |       | 651    | Note   |
| PLAT883_ALERT_1_G | No Info/Value for _atom_sites_solution_primary   | .     | Please | Do !   |
| PLAT910_ALERT_3_G | Missing # of FCF Reflection(s) Below Theta(Min). |       | 2      | Note   |
| PLAT912_ALERT_4_G | Missing # of FCF Reflections Above STh/L= 0.600  |       | 593    | Note   |
| PLAT933_ALERT_2_G | Number of HKL-OMIT Records in Embedded .res File |       | 9      | Note   |
| PLAT941_ALERT_3_G | Average HKL Measurement Multiplicity .....       |       | 4.3    | Low    |
| PLAT978_ALERT_2_G | Number C-C Bonds with Positive Residual Density. |       | 0      | Info   |
| PLAT992_ALERT_5_G | Repd & Actual _reflns_number_gt Values Differ by |       | 3      | Check  |

---

0 **ALERT level A** = Most likely a serious problem - resolve or explain

1 **ALERT level B** = A potentially serious problem, consider carefully  
64 **ALERT level C** = Check. Ensure it is not caused by an omission or oversight  
24 **ALERT level G** = General information/check it is not something unexpected

5 ALERT type 1 CIF construction/syntax error, inconsistent or missing data  
72 ALERT type 2 Indicator that the structure model may be wrong or deficient  
5 ALERT type 3 Indicator that the structure quality may be low  
5 ALERT type 4 Improvement, methodology, query or suggestion  
2 ALERT type 5 Informative message, check

---

---

It is advisable to attempt to resolve as many as possible of the alerts in all categories. Often the minor alerts point to easily fixed oversights, errors and omissions in your CIF or refinement strategy, so attention to these fine details can be worthwhile. In order to resolve some of the more serious problems it may be necessary to carry out additional measurements or structure refinements. However, the purpose of your study may justify the reported deviations and the more serious of these should normally be commented upon in the discussion or experimental section of a paper or in the "special\_details" fields of the CIF. checkCIF was carefully designed to identify outliers and unusual parameters, but every test has its limitations and alerts that are not important in a particular case may appear. Conversely, the absence of alerts does not guarantee there are no aspects of the results needing attention. It is up to the individual to critically assess their own results and, if necessary, seek expert advice.

### **Publication of your CIF in IUCr journals**

A basic structural check has been run on your CIF. These basic checks will be run on all CIFs submitted for publication in IUCr journals (*Acta Crystallographica*, *Journal of Applied Crystallography*, *Journal of Synchrotron Radiation*); however, if you intend to submit to *Acta Crystallographica Section C* or *E* or *IUCrData*, you should make sure that full publication checks are run on the final version of your CIF prior to submission.

### **Publication of your CIF in other journals**

Please refer to the *Notes for Authors* of the relevant journal for any special instructions relating to CIF submission.

---

**PLATON version of 20/01/2022; check.def file version of 19/01/2022**

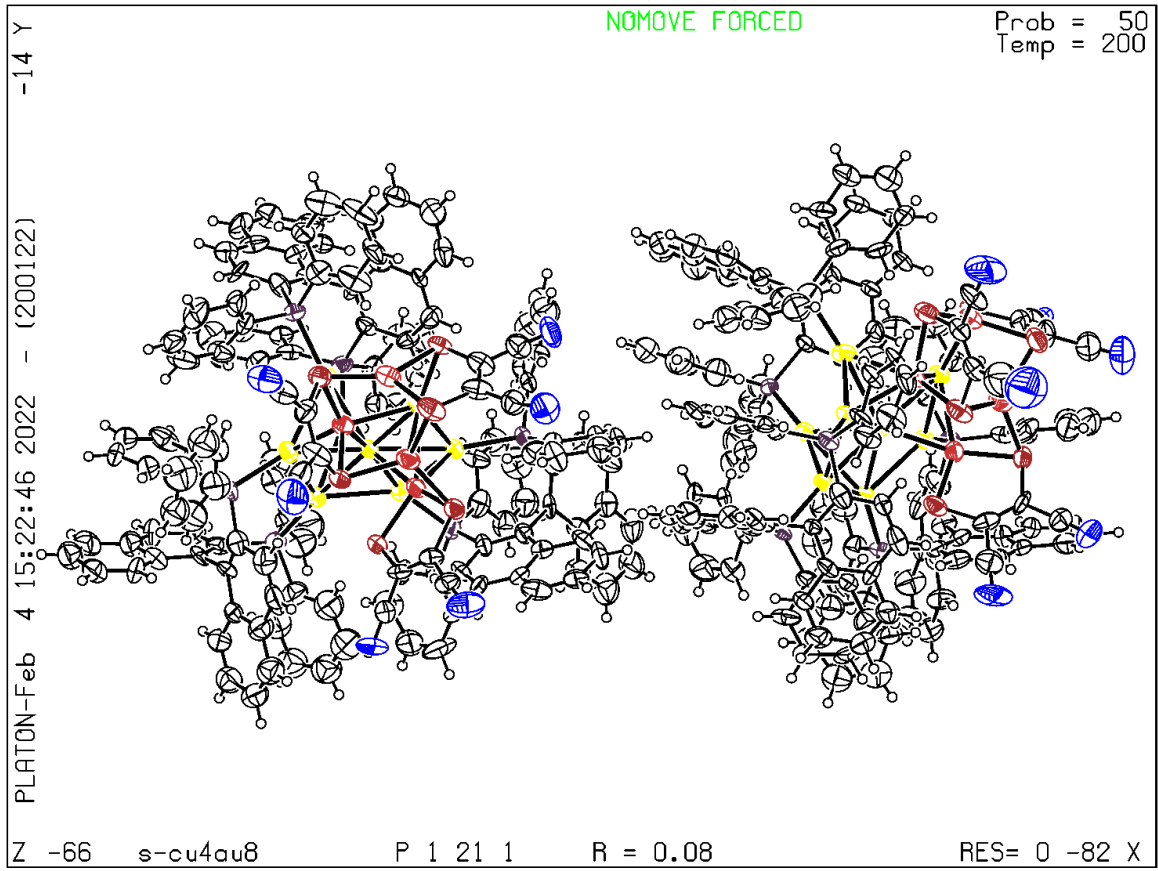

Supplement: oc2c00754_si_008.pdf [file oc2c00754_si_008.pdf]
