# Supplementary material for: Atomically Precise Enantiopure Bimetallic Janus Clusters
Source: PubMed Central journal article supplement (PMC9523771; doi:10.1021/acscentsci.2c00754), 2022-09-07

## checkCIF/PLATON report

You have not supplied any structure factors. As a result the full set of tests cannot be run.

THIS REPORT IS FOR GUIDANCE ONLY. IF USED AS PART OF A REVIEW PROCEDURE FOR PUBLICATION, IT SHOULD NOT REPLACE THE EXPERTISE OF AN EXPERIENCED CRYSTALLOGRAPHIC REFEREE.

No syntax errors found.      CIF dictionary      Interpreting this report

### Datablock: au3cd

---

|                        |                                       |                                       |               |
|------------------------|---------------------------------------|---------------------------------------|---------------|
| Bond precision:        | C-C = 0.0164 A                        | Wavelength=1.54184                    |               |
| Cell:                  | a=22.9702 (2)                         | b=23.8042 (2)                         | c=27.0023 (3) |
|                        | alpha=90                              | beta=90                               | gamma=90      |
| Temperature:           | 200 K                                 |                                       |               |
|                        | Calculated                            | Reported                              |               |
| Volume                 | 14764.5 (2)                           | 14764.5 (2)                           |               |
| Space group            | P b c a                               | P b c a                               |               |
| Hall group             | -P 2ac 2ab                            | -P 2ac 2ab                            |               |
| Moiety formula         | C79 H66 Au3 Cd Cl N2 P6 S2,<br>C H4 O | C79 H66 Au3 Cd Cl N2 P6 S2,<br>C H4 O |               |
| Sum formula            | C80 H70 Au3 Cd Cl N2 O P6<br>S2       | C80 H70 Au3 Cd Cl N2 O P6<br>S2       |               |
| Mr                     | 2064.09                               | 2064.07                               |               |
| Dx, g cm <sup>-3</sup> | 1.857                                 | 1.857                                 |               |
| Z                      | 8                                     | 8                                     |               |
| Mu (mm <sup>-1</sup> ) | 15.689                                | 15.689                                |               |
| F000                   | 7968.0                                | 7968.0                                |               |
| F000'                  | 7900.17                               |                                       |               |
| h, k, lmax             | 28, 29, 33                            | 28, 29, 32                            |               |
| Nref                   | 15073                                 | 14686                                 |               |
| Tmin, Tmax             | 0.108, 0.095                          | 0.091, 1.000                          |               |
| Tmin'                  | 0.017                                 |                                       |               |

Correction method= # Reported T Limits: Tmin=0.091 Tmax=1.000

AbsCorr = MULTI-SCAN

Data completeness= 0.974

Theta (max)= 74.384

R(reflections) = 0.0544 ( 11698)

wR2(reflections) =  
0.1551 ( 14686)

S = 1.029

Npar = 959

---

The following ALERTS were generated. Each ALERT has the format

**test-name\_ALERT\_alert-type\_alert-level.**

Click on the hyperlinks for more details of the test.

---

### ● Alert level C

|                   |                                                  |         |        |
|-------------------|--------------------------------------------------|---------|--------|
| PLAT094_ALERT_2_C | Ratio of Maximum / Minimum Residual Density .... | 2.22    | Report |
| PLAT234_ALERT_4_C | Large Hirshfeld Difference C20 --C21 .           | 0.22    | Ang.   |
| PLAT241_ALERT_2_C | High 'MainMol' Ueq as Compared to Neighbors of   | S2      | Check  |
| PLAT241_ALERT_2_C | High 'MainMol' Ueq as Compared to Neighbors of   | C59     | Check  |
| PLAT241_ALERT_2_C | High 'MainMol' Ueq as Compared to Neighbors of   | C69     | Check  |
| PLAT241_ALERT_2_C | High 'MainMol' Ueq as Compared to Neighbors of   | C72     | Check  |
| PLAT241_ALERT_2_C | High 'MainMol' Ueq as Compared to Neighbors of   | C73     | Check  |
| PLAT242_ALERT_2_C | Low 'MainMol' Ueq as Compared to Neighbors of    | C5      | Check  |
| PLAT242_ALERT_2_C | Low 'MainMol' Ueq as Compared to Neighbors of    | C68     | Check  |
| PLAT242_ALERT_2_C | Low 'MainMol' Ueq as Compared to Neighbors of    | C71     | Check  |
| PLAT260_ALERT_2_C | Large Average Ueq of Residue Including 01        | 0.148   | Check  |
| PLAT342_ALERT_3_C | Low Bond Precision on C-C Bonds .....            | 0.01637 | Ang.   |

---

### ● Alert level G

|                   |                                                  |             |        |
|-------------------|--------------------------------------------------|-------------|--------|
| PLAT002_ALERT_2_G | Number of Distance or Angle Restraints on AtSite | 22          | Note   |
| PLAT003_ALERT_2_G | Number of Uiso or Uij Restrained non-H Atoms ... | 29          | Report |
| PLAT007_ALERT_5_G | Number of Unrefined Donor-H Atoms .....          | 1           | Report |
| PLAT083_ALERT_2_G | SHELXL Second Parameter in WGHT Unusually Large  | 94.44       | Why ?  |
| PLAT142_ALERT_4_G | s.u. on b - Axis Small or Missing .....          | 0.00020     | Ang.   |
| PLAT172_ALERT_4_G | The CIF-Embedded .res File Contains DFIX Records | 4           | Report |
| PLAT173_ALERT_4_G | The CIF-Embedded .res File Contains DANG Records | 1           | Report |
| PLAT174_ALERT_4_G | The CIF-Embedded .res File Contains FLAT Records | 3           | Report |
| PLAT177_ALERT_4_G | The CIF-Embedded .res File Contains DELU Records | 1           | Report |
| PLAT186_ALERT_4_G | The CIF-Embedded .res File Contains ISOR Records | 6           | Report |
| PLAT301_ALERT_3_G | Main Residue Disorder .....(Resd 1 )             | 11%         | Note   |
| PLAT793_ALERT_4_G | Model has Chirality at P4 (Centro SPGR)          | S           | Verify |
| PLAT860_ALERT_3_G | Number of Least-Squares Restraints .....         | 214         | Note   |
| PLAT883_ALERT_1_G | No Info/Value for _atom_sites_solution_primary . | Please Do ! |        |
| PLAT933_ALERT_2_G | Number of HKL-OMIT Records in Embedded .res File | 1           | Note   |
| PLAT941_ALERT_3_G | Average HKL Measurement Multiplicity .....       | 3.7         | Low    |

---

- 0 **ALERT level A** = Most likely a serious problem - resolve or explain  
0 **ALERT level B** = A potentially serious problem, consider carefully  
12 **ALERT level C** = Check. Ensure it is not caused by an omission or oversight  
16 **ALERT level G** = General information/check it is not something unexpected

- 1 ALERT type 1 CIF construction/syntax error, inconsistent or missing data  
14 ALERT type 2 Indicator that the structure model may be wrong or deficient  
4 ALERT type 3 Indicator that the structure quality may be low  
8 ALERT type 4 Improvement, methodology, query or suggestion  
1 ALERT type 5 Informative message, check
- 
-

It is advisable to attempt to resolve as many as possible of the alerts in all categories. Often the minor alerts point to easily fixed oversights, errors and omissions in your CIF or refinement strategy, so attention to these fine details can be worthwhile. In order to resolve some of the more serious problems it may be necessary to carry out additional measurements or structure refinements. However, the purpose of your study may justify the reported deviations and the more serious of these should normally be commented upon in the discussion or experimental section of a paper or in the "special\_details" fields of the CIF. checkCIF was carefully designed to identify outliers and unusual parameters, but every test has its limitations and alerts that are not important in a particular case may appear. Conversely, the absence of alerts does not guarantee there are no aspects of the results needing attention. It is up to the individual to critically assess their own results and, if necessary, seek expert advice.

### **Publication of your CIF in IUCr journals**

A basic structural check has been run on your CIF. These basic checks will be run on all CIFs submitted for publication in IUCr journals (*Acta Crystallographica*, *Journal of Applied Crystallography*, *Journal of Synchrotron Radiation*); however, if you intend to submit to *Acta Crystallographica Section C* or *E* or *IUCrData*, you should make sure that full publication checks are run on the final version of your CIF prior to submission.

### **Publication of your CIF in other journals**

Please refer to the *Notes for Authors* of the relevant journal for any special instructions relating to CIF submission.

---

**PLATON version of 20/01/2022; check.def file version of 19/01/2022**

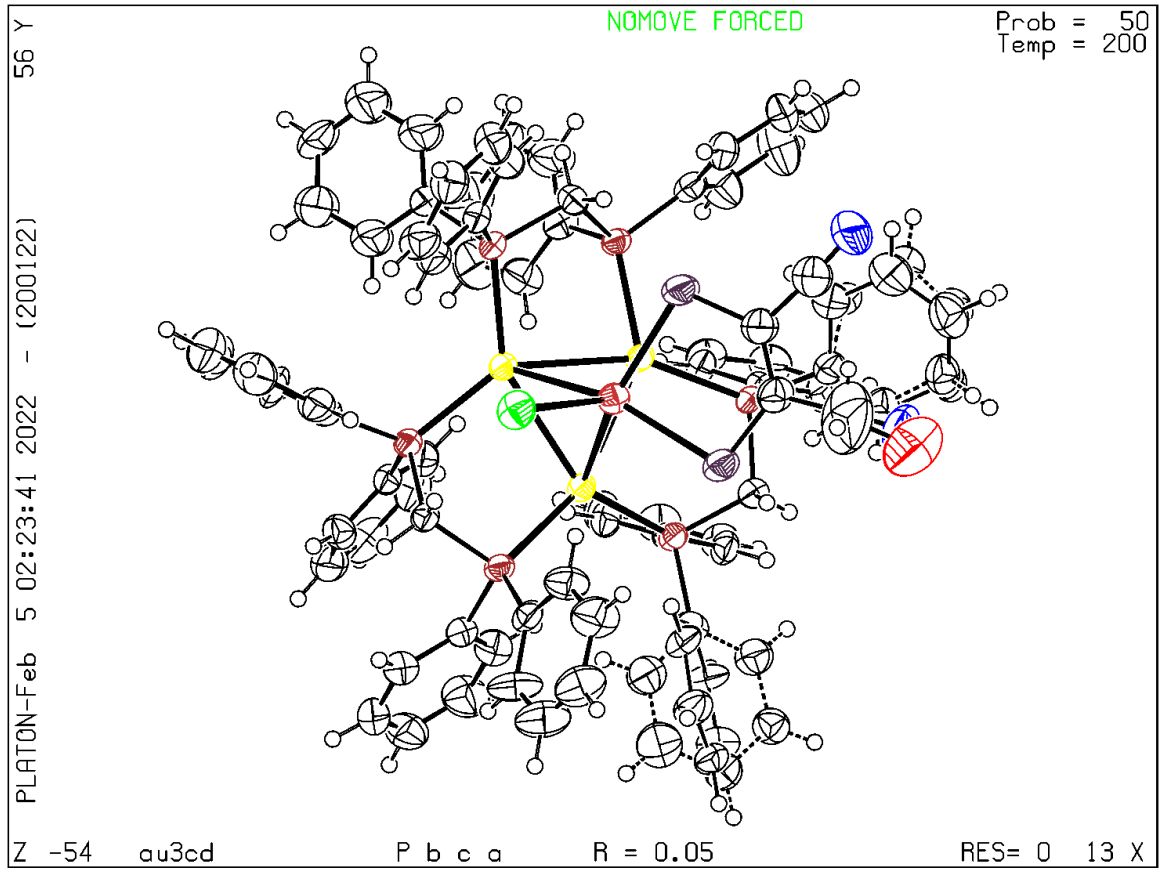

Supplement: oc2c00754_si_009.pdf [file oc2c00754_si_009.pdf]
