# Supplementary material for: Atomically Precise Enantiopure Bimetallic Janus Clusters
Source: PubMed Central journal article supplement (PMC9523771; doi:10.1021/acscentsci.2c00754), 2022-09-07
Supplement: oc2c00754_si_001.pdf [file oc2c00754_si_001.pdf]

## Supporting Information

### **Atomically Precise Enantiopure Bimetallic Janus-Superatomic clusters**

Yao Li,<sup>1</sup> Qiu-Xu Zang,<sup>1</sup> Xi-Yan Dong,<sup>1,2</sup> Zhao-Yang Wang,<sup>1</sup> Peng Luo,<sup>1,2</sup> Xi-Ming Luo,<sup>1</sup> and Shuang-Quan Zang<sup>1,\*</sup>

<sup>1</sup>Henan Key Laboratory of Crystalline Molecular Functional Materials, Henan International Joint Laboratory of Tumor Theranostical Cluster Materials, Green Catalysis Center, and College of Chemistry, Zhengzhou University, Zhengzhou 450001, China.

<sup>2</sup>College of Chemistry and Chemical Engineering, Henan Polytechnic University, Jiaozuo 454000, China.

\*E-mail: zangsqzg@zzu.edu.cn

## Section S1: Materials and Methods

### Materials and Reagents.

Sodium borohydride (NaBH<sub>4</sub>, 98%), triphenylphosphine (PPh<sub>3</sub>, 99%), tetrakis(acetonitrile)copper(I) hexa-fluorophosph, (S)-(-)-2,2'-bis(diphenylphosphino)-1,1'-binaphthyl, (R)-(+)-2,2'-bis(diphenylphosphino)-1,1'-binaphthyl, gold (III) chloride hydrate were purchased from Energy Chemical. Na<sub>2</sub>MNT was purchased from Jiangsu Beida Pharmaceutical Technology Co., Ltd. Dichloromethane (CH<sub>2</sub>Cl<sub>2</sub>, A.R.), and methanol (CH<sub>3</sub>OH, A.R.) were purchased from Sinopharm Chemical Reagent Co. Ltd. (Shanghai, China). All reagents were used as received without further purification.

### Instrumentation.

UV-Vis absorption spectra were recorded using a Hitachi UH4150 UV-Visible spectrophotometer in the range 200-800 nm. Circular dichroism (CD) spectra were recorded by a Chirascan V100 spectropolarimeter in dichloromethane (DCM) solution. X-ray photoelectron spectroscopy (XPS) was recorded using ThermoFisher ESCALAB 250XI with Al K $\alpha$  as excitation source. Binding energy were calibrated by C 1s at 284.8 eV. HRESI-TOF-MS spectrum were collected on a Sciex X500R Q-TOF spectrometer. EDS measurement was carried out using Zeiss Sigma 500. High-resolution transmission electron microscopy (TEM) studies were performed on a Tecnai G2 F20S. Powder X-ray diffraction data was acquired at room temperature in air using a Rigaku MiniFlex diffractometer (Cu-K $\alpha$ ;  $\lambda = 1.54178 \text{ \AA}$ ;  $2\theta$  range of 3-50°). Anisotropic photocurrent was measured by two-probe method with a semiconductor parameter analyzer (B1500A, Keysight), and the electrodes device is in a probe station (CGO-4, Cindbest). A 450 nm light with a power density of 1 mW/cm<sup>2</sup> was used as the light source for the optical switch characteristics measurements.

### Single-Crystal X-ray Diffraction Analysis.

Single-crystal X-ray diffraction measurements of the **racemate Au-Cu**, **R/S-Au-Cu** and **Au<sub>3</sub>Cd** complexes were performed with a Rigaku XtaLAB Pro diffractometer. Data collection and reduction were performed using the program CrysAlisPro.<sup>1</sup> All the structures were solved by intrinsic phasing methods (*SHELXT-2015*)<sup>2</sup> and refined by full-matrix least squares on  $F^2$  using Olex2,<sup>3</sup> which utilizes the *SHELXL-2015* module.<sup>4</sup> All nonhydrogen atoms were placed based on electron density and refined with anisotropic thermal parameters, and hydrogen atoms were placed in calculated positions with idealized geometries and assigned fixed isotropic displacement parameters.

For **racemate Au-Cu**, appropriate restraints (DFIX, DELU, ISOR) were applied to the geometry, and the atomic displacement parameters of the atoms in the clusters were determined. Due to the disordered PPh<sub>3</sub> ligands, DFIX restraints were applied to keep the P-C bond length (1.85 Å) in a reasonable range. DELU and ISOR restraints were used for some C, P and Cl atoms with large thermal motion. The disordered solvent molecules in the structure could not be well identified, so the 'Solvent Mask' was adopted to remove them during structural refinement.

For **R-Au-Cu**, appropriate restraints (DFIX, SIMU, ISOR) were applied to the geometry, and the atomic displacement parameters of the atoms in the clusters were determined. Due to the less than ideal resolution, DFIX restraints were applied to keep the C-C bond length (1.39 Å) of the benzene ring in a reasonable range. SIMU and ISOR restraints were used for some C, N and Cl atoms from some organic ligands with large thermal motion. The disordered solvent molecules in the structure could not be well identified, so the 'Solvent Mask' was adopted to remove them during structural refinement.

For **S-Au-Cu**, appropriate restraints (DFIX, DELU, ISOR) were applied to the geometry, and the atomic displacement parameters of the atoms in the clusters were determined. Due to the less than ideal resolution, DFIX restraints were applied to keep the C-C bond length (1.39 Å) of the benzene ring in a reasonable range. DELU and ISOR restraints were used for some C, N and Cl atoms from some organic ligands with large thermal motion. The disordered solvent molecules in the structure could not be well identified, so the 'Solvent Mask' was adopted to remove them in structural refinement.

For **Au<sub>3</sub>Cd**, appropriate restraints (DFIX, FLAT, DELU, ISOR) were applied to the geometry, and the atomic displacement parameters of the atoms in the clusters were determined. Due to the less than ideal resolution, DFIX restraints were applied to keep the C-C bond length (1.39 Å) of the benzene ring in a reasonable range. FLAT restraints were applied to maintain the planarity of the benzene ring. DELU and

ISOR restraints were used for some C, N and Cl atoms from some organic ligands with large thermal motion.

## Section S2: Synthesis

### Synthesis of single crystals of racemate of $\text{Cu}_4\text{Au}_8(\text{TPP})_6(\text{MNT})_3$ .

A mixture of  $\text{Na}_2\text{MNT}$  (0.02 mmol),  $\text{AuPPh}_3\text{Cl}$  (0.02 mmol), and  $\text{Cu}(\text{CH}_3\text{CN})_4\text{PF}_6$  (0.018 mmol) was added to 2 mL of methanol and 2 mL of dichloromethane and vigorously stirred with a magnetic stirring bar. After 20 min of stirring, 3 mg of  $\text{NaBH}_4$  was quickly added with vigorous stirring. The reaction was performed for 24 hours at room temperature. Black–red block crystals in a yield of 20% were obtained after several days of slow solvent evaporation. Elemental analysis (%) for evacuated  $\text{Cu}_4\text{Au}_8(\text{TPP})_6(\text{MNT})_3$ : calcd C: 37.69, H: 2.37, N: 2.20, S: 5.03; found C: 37.53, H: 2.31, N: 2.16, S: 4.92.

### Synthesis of homochiral single crystals of $R/S\text{-Cu}_4\text{Au}_8(\text{BINAP})_3(\text{MNT})_3$ .

Similar to the synthesis of  $\text{Cu}_4\text{Au}_8(\text{TPP})_6(\text{MNT})_3$ , with the exception of the use of 0.01 mmol of (*R*-BINAP $\text{Au}_2\text{Cl}_2$ )/(*S*-BINAP $\text{Au}_2\text{Cl}_2$ ) in place of 0.02 mmol of  $\text{AuPPh}_3\text{Cl}$ . Black–red block crystals in a yield of 5% were obtained after several days of slow solvent evaporation. Elemental analysis (%) for evacuated  $R\text{-Cu}_4\text{Au}_8(\text{BINAP})_3(\text{MNT})_3$ : calcd C: 42.00, H: 2.35, N: 2.04, S: 4.67; found C: 41.73, H: 2.27, N: 1.75, S: 4.13.

### Synthesis of single crystals of $\text{Au}_3\text{Cd}(\text{DPPM})_3(\text{MNT})\text{Cl}$ .

A mixture of  $\text{Na}_2\text{MNT}$  (0.02 mmol),  $\text{CdCl}_2$  (0.03 mmol),  $\text{AuSMe}_2\text{Cl}$  (0.02 mmol) and DPPM (0.02 mmol) was added to 2 mL of methanol and 2 mL of dichloromethane and vigorously stirred with a magnetic stirring bar. Then, 3 mg of  $\text{NaBH}_4$  was quickly added with vigorous stirring. The reaction was aged for 12 hours at room temperature. Red block crystals in a yield of 25% were obtained after several days of slow solvent evaporation. Elemental analysis (%) for evacuated  $\text{Au}_3\text{Cd}(\text{DPPM})_3(\text{MNT})\text{Cl}$ : calcd C: 46.69, H: 3.27, N: 1.38, S: 3.16; found C: 46.77, H: 3.21, N: 1.22, S: 3.11.

## Section S3 Structures.

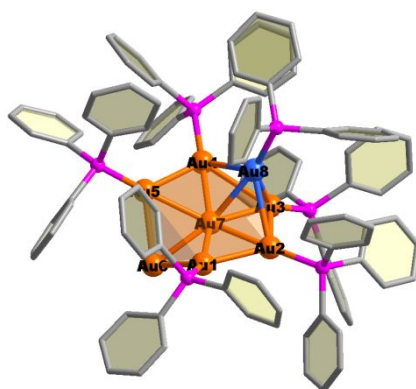

**Figure S1.** The Au-hemisphere in racemate Au-Cu, Au8 is highlighted in light blue. Au1 to Au6 form a twisted hexagon, and Au7 is located in the center of the hexagon.

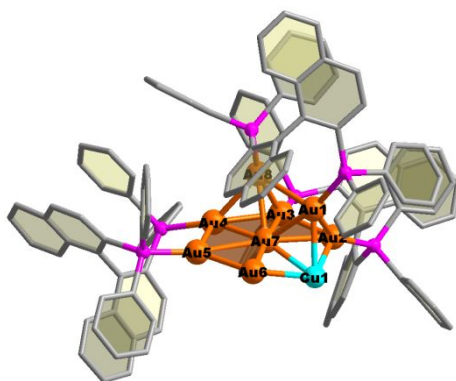

**Figure S2.** The  $\text{Cu}_1\text{Au}_8$  in *R*-Au-Cu. Compared to **Racemate Au-Cu**, the three bidentate phosphine ligands chlate Au1 and Au8, Au2 and Au3, Au4 and Au5, respectively.

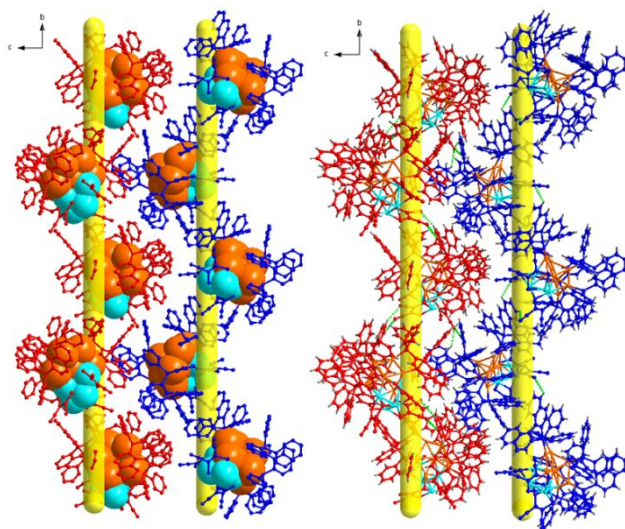

**Figure S3.** Arrangement of the *R*-Au-Cu cluster along the a-axis. The *R*-Au-Cu cluster are located along  $2_1$  screw axis with the orientation of dipole moment aligned  $2_1$ , and forming “head-to-tail” alignment. It was found that C-H  $\cdots$  N hydrogen bonds (2.45 - 2.88 Å) between MNT and naphthalene groups of BINAP ligands.

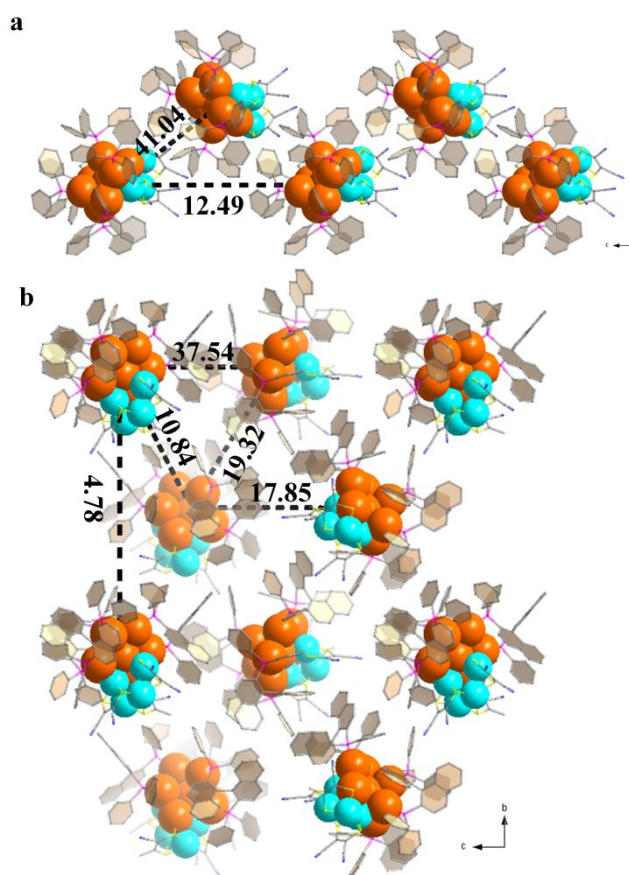

**Figure S4.** NC dipole alignment in the crystal states of **racemate Au-Cu** (a) and **R-Au-Cu** (b) the energy of attraction interactions between two NC dipoles are indicated in the unit of kJ/mol. Color legend: orange sphere, Au; turquoise sphere, Cu; pink sphere, P; yellow sphere, S; blue sphere, N; gray sphere, C. All hydrogen atoms are omitted for clarity.

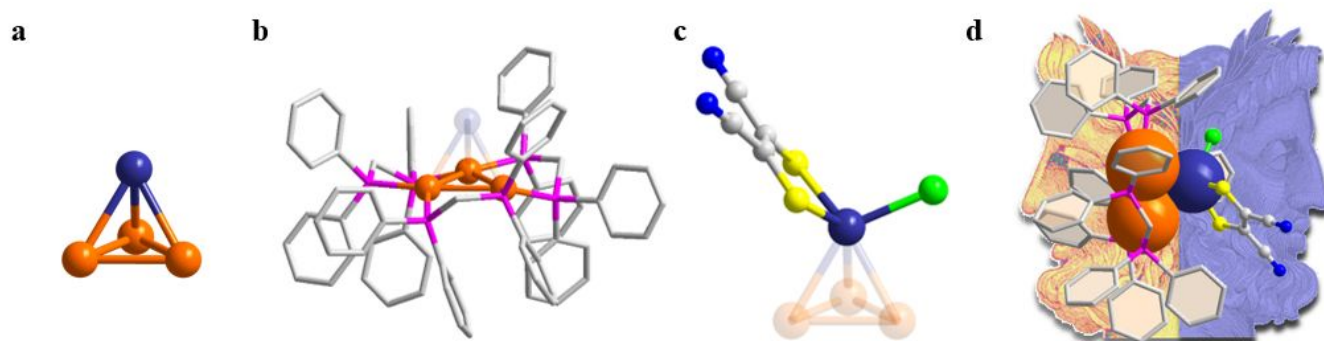

**Figure S5.** Structure of Janus **Au<sub>3</sub>Cd**. a. Au<sub>3</sub>Cd. b. the Au-hemisphere in the Au<sub>3</sub>Cd. c. the Cd-hemisphere in the Au<sub>3</sub>Cd. d. molecular structure of Au<sub>3</sub>Cd cluster. Indigo and yellow Janus image embodied Cd-hemisphere and Au hemisphere. Color legend: orange sphere, Au; Indigo sphere, Cd; pink sphere, P; yellow sphere, S; blue sphere, N; gray sphere, C. All hydrogen atoms are omitted for clarity.

## Section S4 Characterizations.

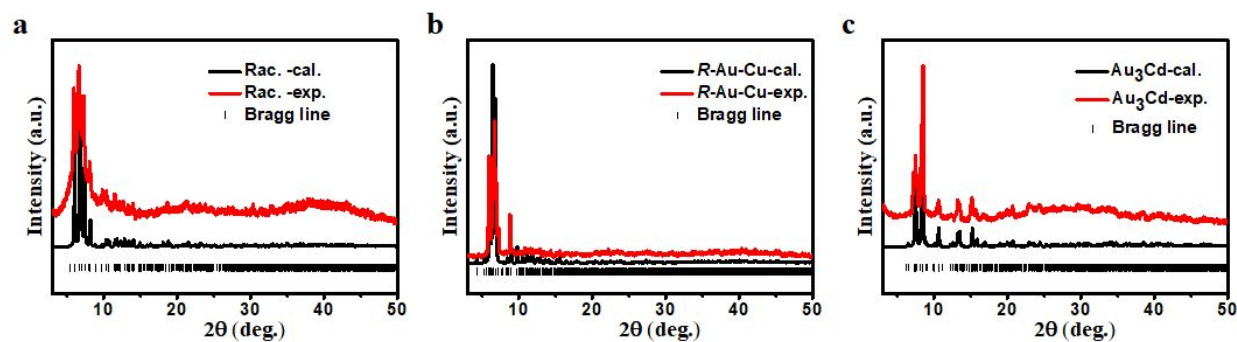

**Figure S6.** PXRD spectra of **racemate Au-Cu**, ***R*-Au-Cu** and **Au<sub>3</sub>Cd**. a. PXRD spectra of **racemate Au-Cu**. b. PXRD spectra of ***R*-Au-Cu**. c. PXRD spectra of **Au<sub>3</sub>Cd**.

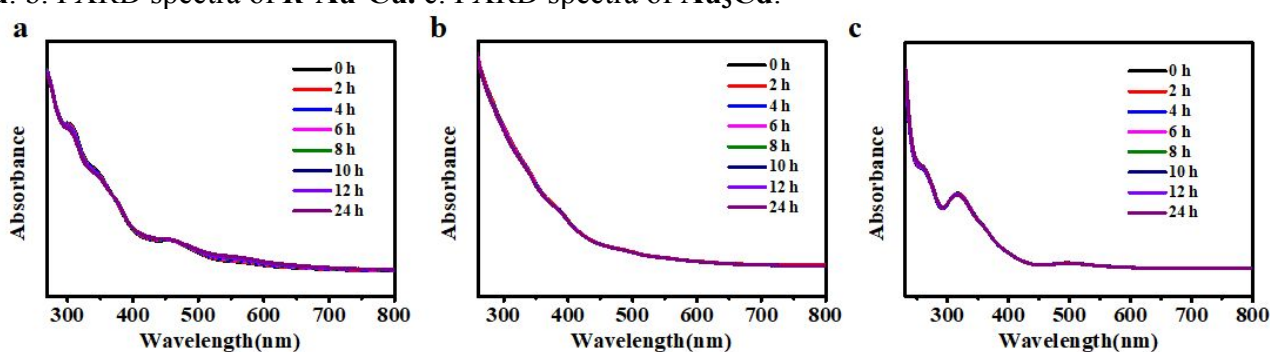

**Figure S7.** The time-dependent UV-vis absorption spectra of **racemate Au-Cu**, ***R*-Au-Cu** and **Au<sub>3</sub>Cd**. a. The time-dependent UV-vis absorption spectra of **racemate Au-Cu** in DMF. b. The time-dependent UV-vis absorption spectra of ***R*-Au-Cu** in DCM. c. The time-dependent UV-vis absorption spectra of **Au<sub>3</sub>Cd** in DCM.

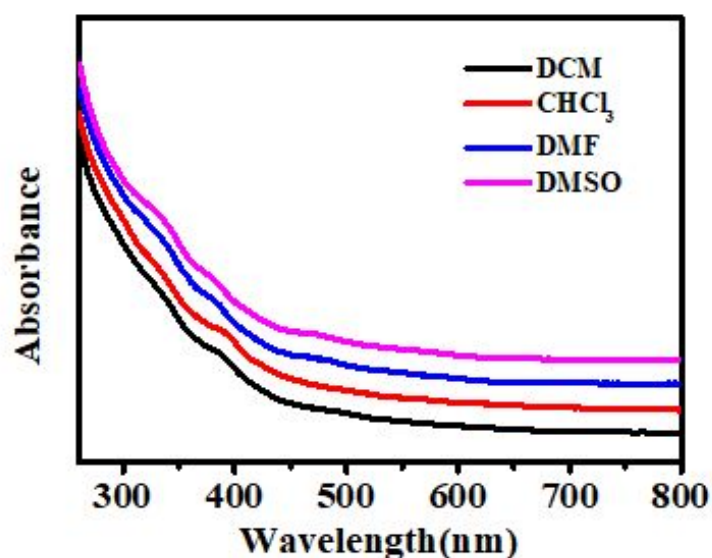

**Figure S8.** The UV-vis absorption spectra of ***R*-Au-Cu** in different solvents.

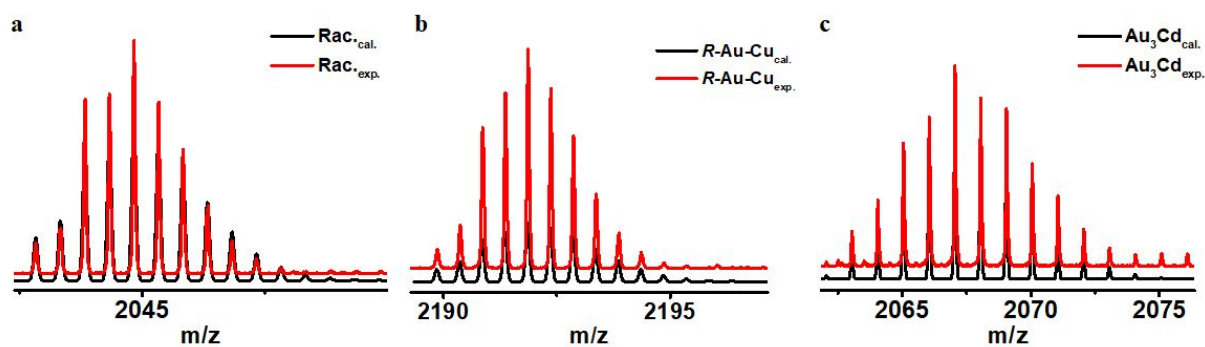

**Figure S9.** Mass spectra of **racemate Au-Cu**, **R-Au-Cu** in positive mode with  $\text{Cs}_2\text{CO}_3$  and mass spectra of **Au<sub>3</sub>Cd** in negative mode. a. The peak at  $m/z = 2044.83$  corresponds to  $[\text{Cs}_2\text{Cu}_4\text{Au}_8(\text{TPP})_6(\text{MNT})_3]^{2+}$ . b. The peak at  $m/z = 2191.86$  corresponds to  $[\text{Cs}_2\text{Cu}_4\text{Au}_8(\text{R-BINAP})_3(\text{MNT})_3]^{2+}$ . c. The peak at  $m/z = 2067.05$  corresponds to  $[\text{Au}_3\text{Cd}(\text{DPPM})_3(\text{MNT})\text{Cl}_2]^-$ .

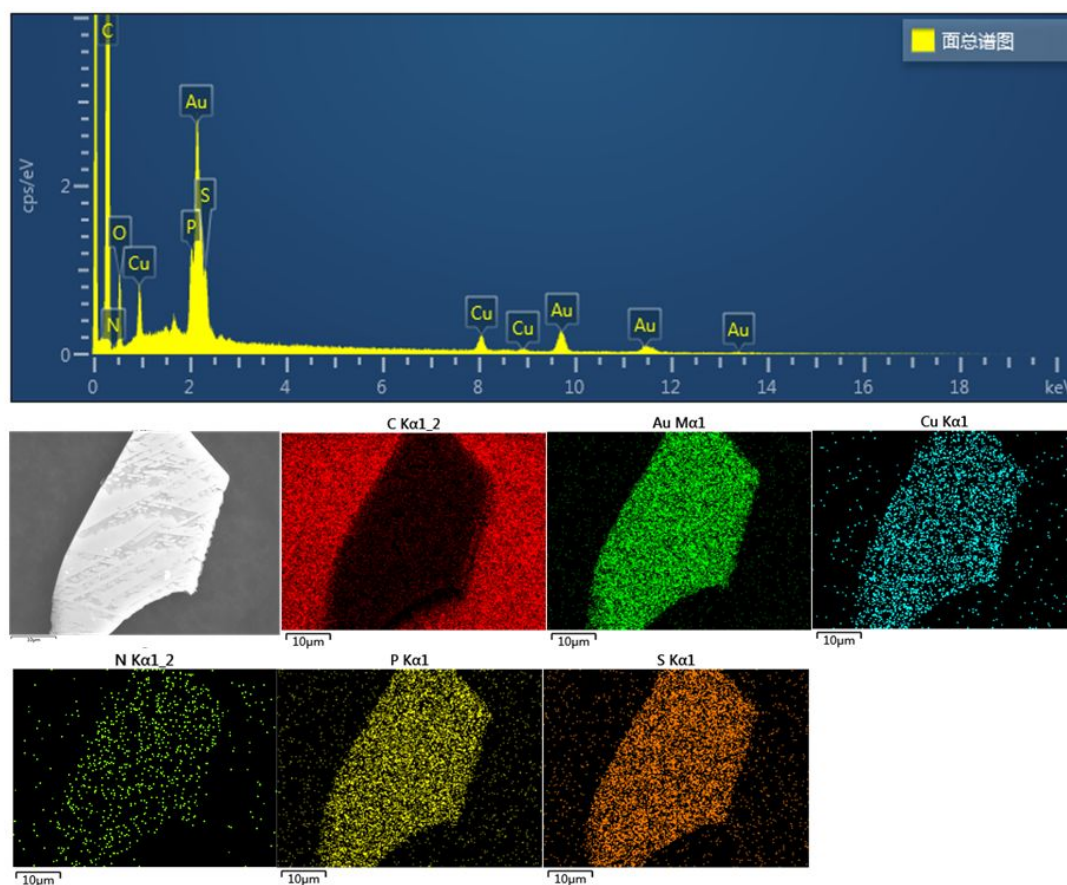

**Figure S10.** The EDS mapping of the **racemate Au-Cu** crystal. The result shows that there is no sodium or chlorine in **racemate Au-Cu**, indicating that the cluster is neutral.

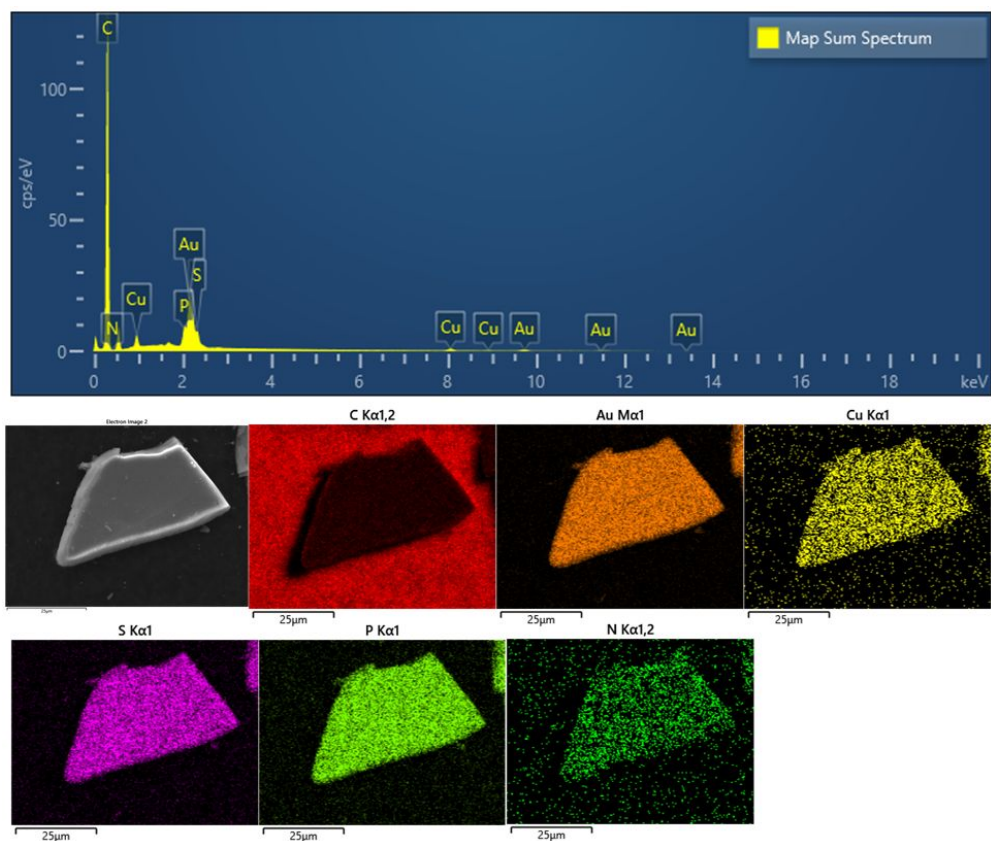

**Figure S11.** The EDS mapping of the *R*-Au-Cu crystal. The EDS elemental analysis result shows that there is no sodium or chlorine in *R*-Au-Cu, indicating that the cluster is neutral.

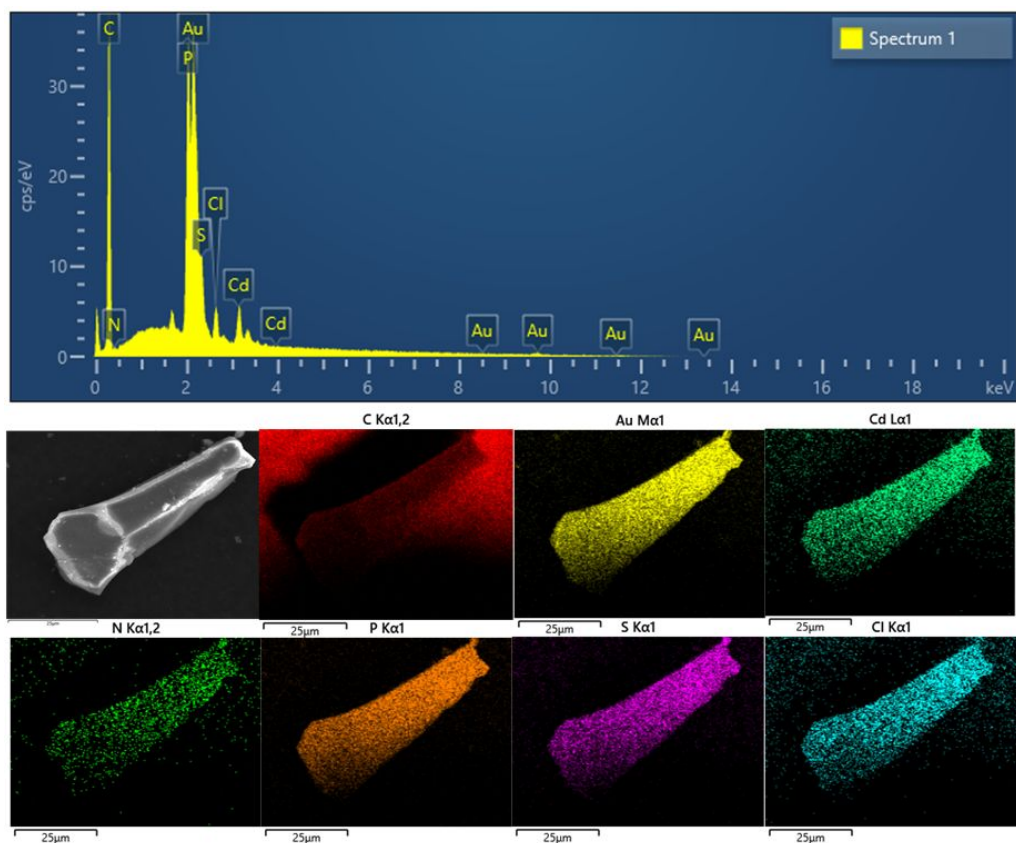

**Figure S12.** The EDS mapping of the Au<sub>3</sub>Cd crystal.



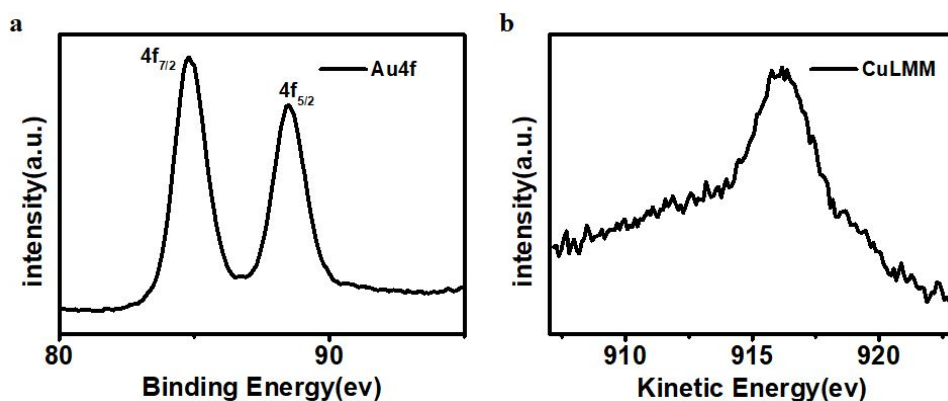

**Figure S13.** The XPS spectra of **racemate Au-Cu** nanocluster. a. Au4f. b. CuLMM. The XPS survey spectrum of Racemate Au-Cu showed an Au  $4f_{7/2}$  (BE of 84.8 eV) peak, suggesting the presence of Au (0) in the cluster. The Cu LMM Auger spectrum of the Racemate Au-Cu shows one main peak at 916.17 eV, which are similar to those obtained for Cu-SR bonds in the Cu(I) oxidation state<sup>5</sup>.

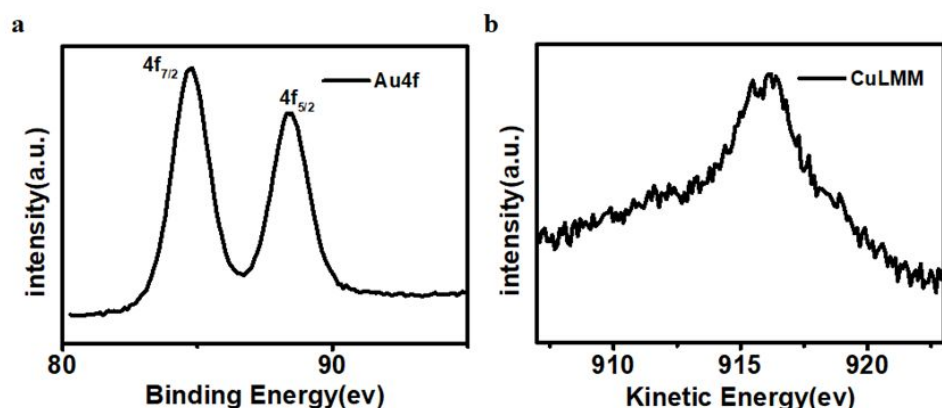

**Figure S14.** The XPS spectra of **R-Au-Cu** nanocluster. a. Au4f. b. CuLMM. The XPS survey spectrum of **R-Au-Cu** showed an Au  $4f_{7/2}$  (BE of 84.8 eV) peak, suggesting the presence of Au (0) in the cluster. The Cu LMM Auger spectrum of the **R-Au-Cu** shows one main peak at 916.19 eV, which are similar to those obtained for Cu-SR bonds in the Cu(I) oxidation state<sup>5</sup>.

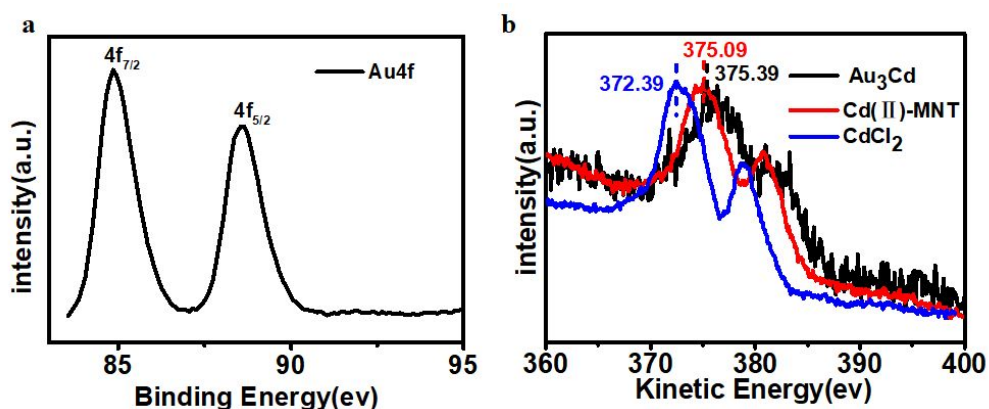

**Figure S15.** X-ray photoelectron spectrum (XPS) data of **Au<sub>3</sub>Cd**: a) Au4f. b) CdMNN. The XPS spectra of **Au<sub>3</sub>Cd** nanocluster. a. Au4f. b. CdMNN. The XPS survey spectrum of **Au<sub>3</sub>Cd** showed an Au  $4f_{7/2}$  (BE of 84.85 eV) peak, suggesting the presence of Au (0) in the cluster. The CdMNN Auger spectrum of the **Au<sub>3</sub>Cd** shows one main peak at 375.39 eV accompanied by one shoulder at around 380.99 eV, which are similar to those obtained for Cd-MNT bonds in the Cd(II) oxidation state.

## Section S5 Theoretical calculations

Density functional theory (DFT) and time-dependent density functional theory (TD-DFT) calculation were performed with Gaussian 16<sup>6</sup> under Perdew–Burke–Ernzerhof (PBE) functional<sup>7</sup>. All calculations were conducted using 6-31g\*\* basis set for H, C, N, P, S and Cl atoms<sup>8</sup>, and SDD effective core potentials for Cu, Cd and Au atoms<sup>9</sup>. The single crystal structure was chosen as initial guess for ground state optimization and all reported stationary points were verified as true minima by the absence of negative eigenvalues in the vibrational frequency analysis. The calculated absorption spectra and CD spectra were obtained from by Multiwfn 3.7 (dev)<sup>10</sup>.

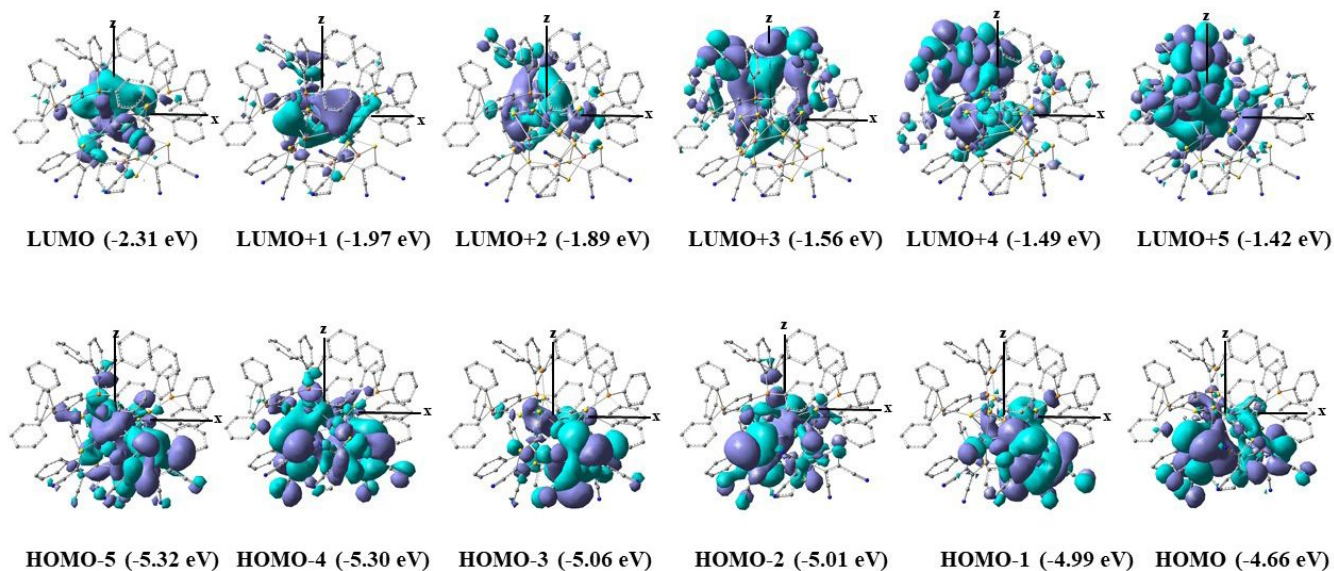

**Figure S16.** Selected frontier MO representations for *R*-cluster component in **racemate Au-Cu**.

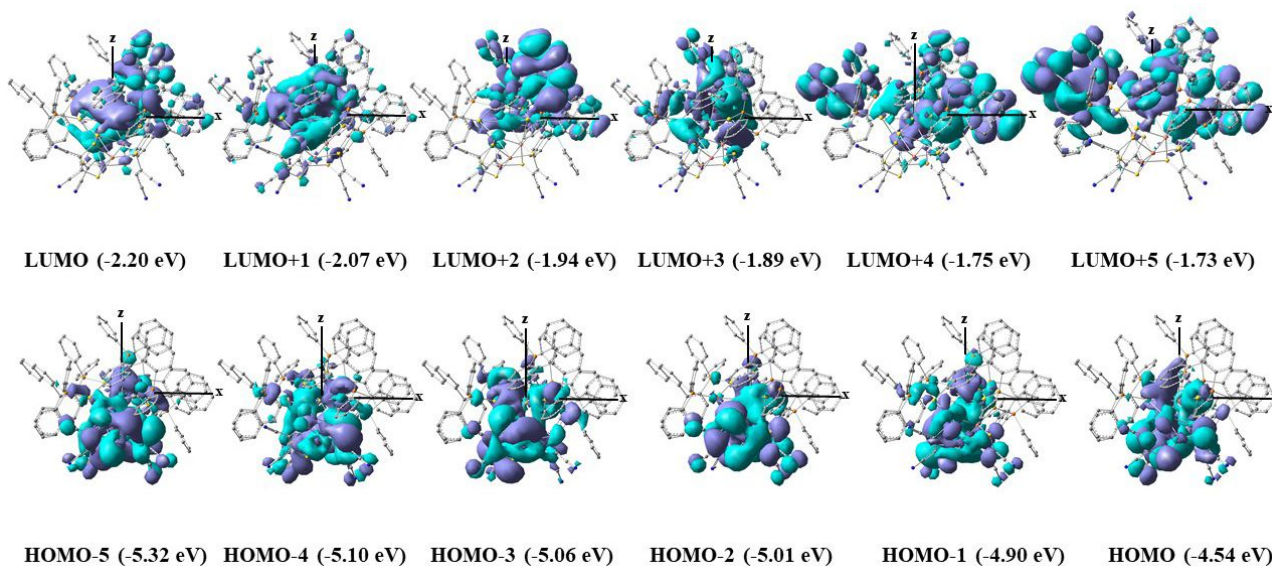

**Figure S17.** Selected frontier MO representations for ***R*-Au-Cu** cluster.

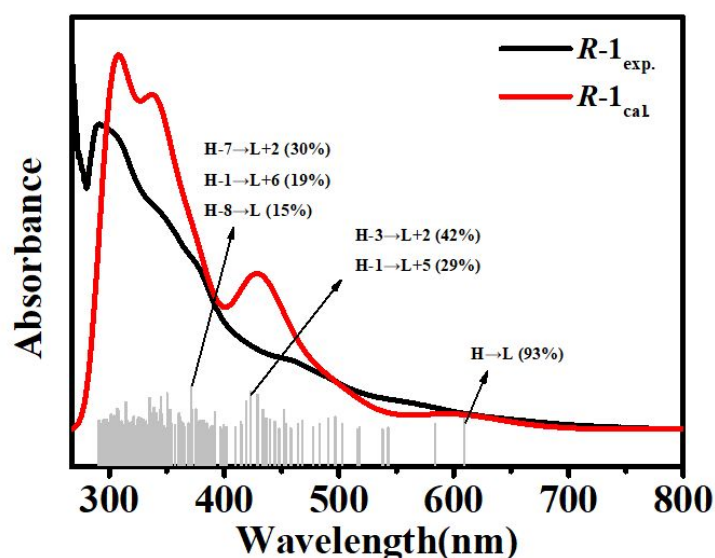

**Figure S18.** Experimental and Calculated UV-Vis spectra of **racemate Au-Cu (*R-1*)**. Owing to strong quantum-size effects, the UV-vis absorption spectra of *R-1* shows multiple molecular-like single-electron transitions, which is consistent with the calculated result. The assignments of transitions can be found in Table S4.

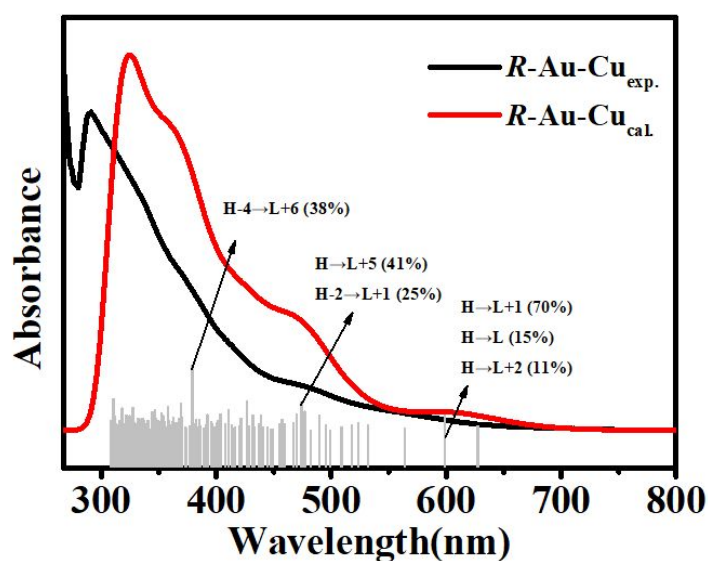

**Figure S19.** Experimental and Calculated UV-Vis spectra of ***R-Au-Cu***. Owing to strong quantum-size effects, the UV-vis absorption spectra of *R-Au-Cu* shows multiple molecular-like single-electron transitions, which is consistent with the calculated result. The assignments of transitions can be found in Table S5.

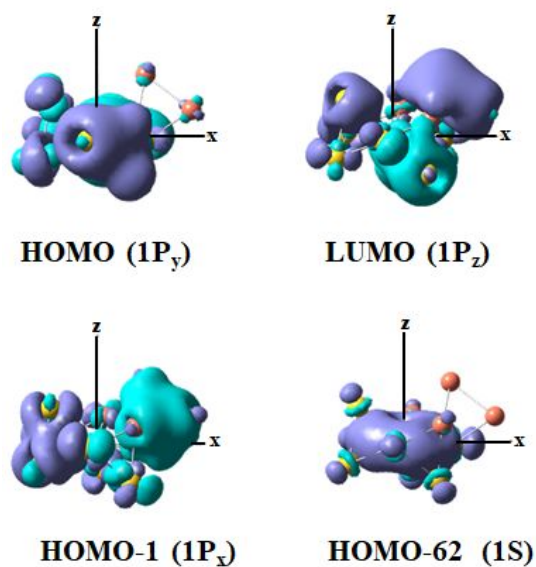

**Figure S20.** The Superatomic orbitals of metal skeleton  $[\text{Au}_8\text{Cu}_4]^{6+}$  (6e) of *R*-cluster component in racemate Au-Cu cluster.

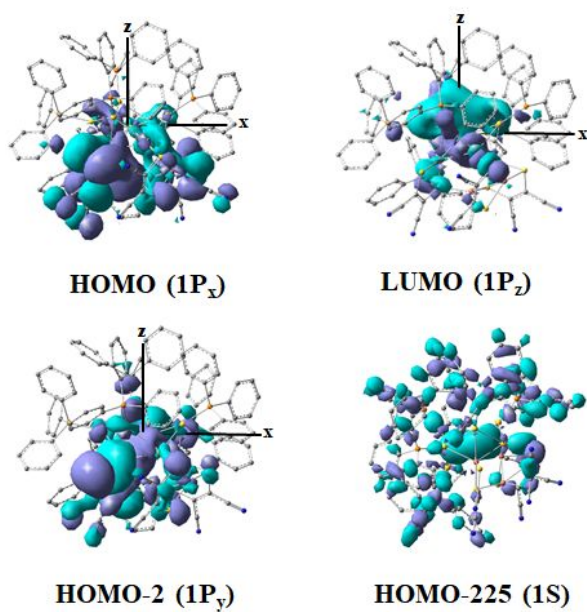

**Figure S21.** Superatomic orbitals in the *R*-cluster component of Racemate Au-Cu.

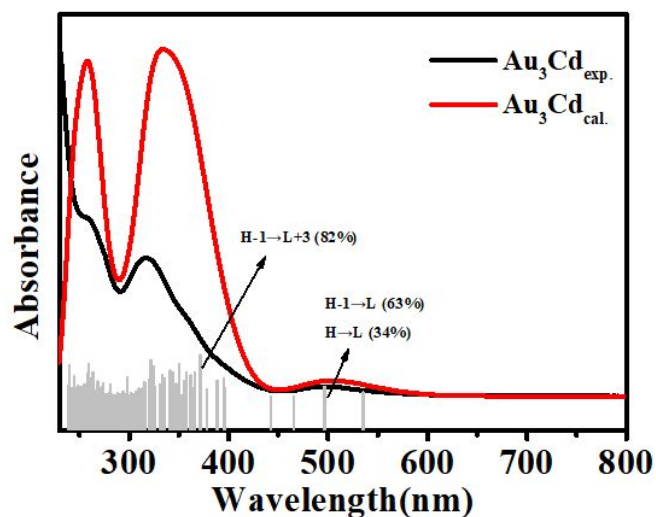

**Figure S22.** Experimental and Calculated UV-Vis spectra of  $\text{Au}_3\text{Cd}$ . Owing to strong quantum-size effects, the UV-vis absorption spectra of  $\text{Au}_3\text{Cd}$  shows multiple molecular-like single-electron transitions, which is consistent with the calculated result. the assignments of transitions can be found in Table S6.

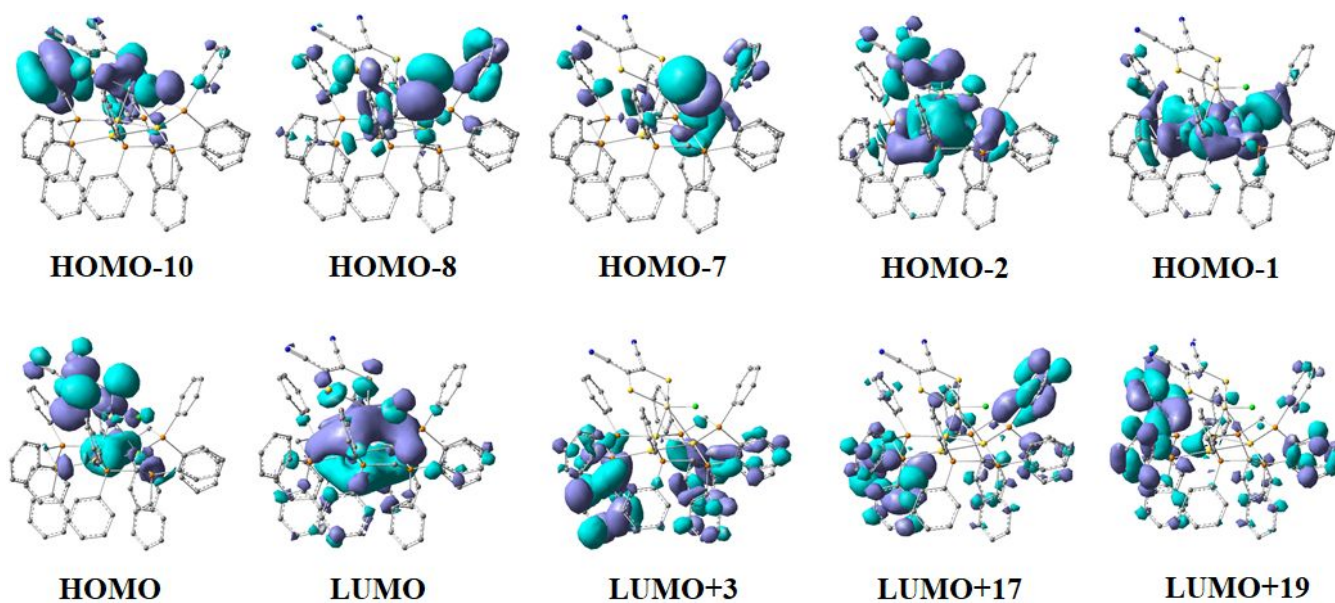

**Figure S23.** Selected frontier MO of the complete  $\text{Au}_3\text{Cd}$  cluster.

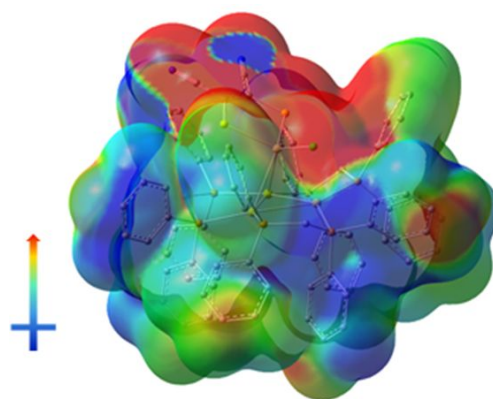

**Dipole Moment : 21.85 D**

**Figure S24.** Dipole moment. Direction and value of dipole moment in  $\text{Au}_3\text{Cd}$ . The red represents the electron-rich region and the blue denoting electron-poor region.

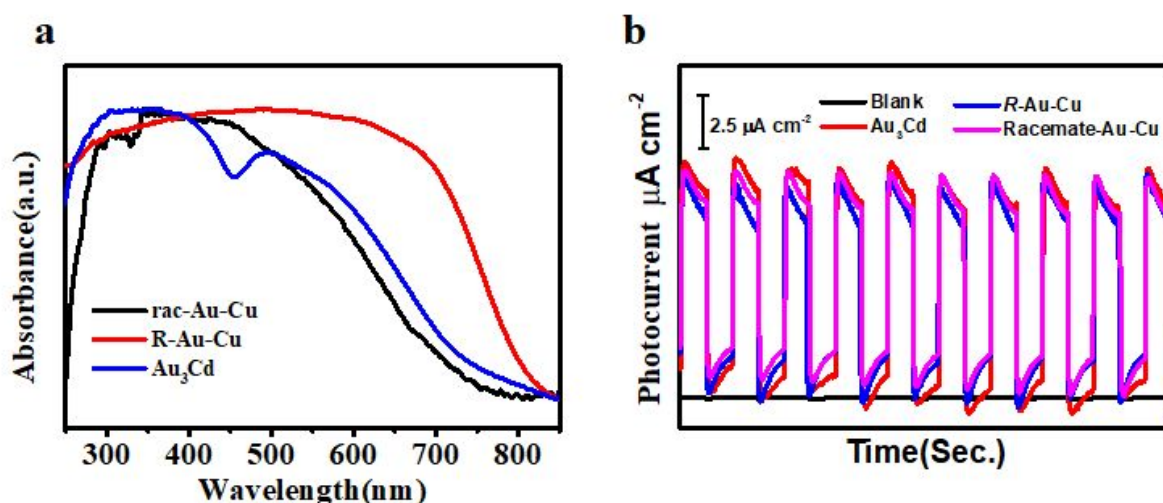

**Figure S25.** UV-visible diffuse reflectance spectra and Photocurrent Response Properties of these Janus clusters. a. Normalized UV-visible diffuse reflectance spectra of **racemate-Au-Cu**, **R-Au-Cu** and **Au<sub>3</sub>Cd** in the solid state. b. Visible light driven photocurrent responses of blank (black), **Au<sub>3</sub>Cd** (red), **R-Au-Cu** (blue) and **racemate-Au-Cu** (pink) in a 0.1 M KCl aqueous solution under repetitive Xe lamp irradiation (intervals of 10 s;  $\lambda > 420$  nm).

Considering that  $\text{MNT}^{2-}$  ligands have delocalized  $\pi$  bonds, the electron density can be enhanced, which is beneficial to increase the electron transport rate. In addition, these clusters have large dipole moments, small band gaps and excellent optical absorption properties,<sup>11,12</sup> which make them potential hybrid organic-inorganic optoelectronic materials. Therefore, we examined the optoelectronics properties of **racemate-Au-Cu**, **R-Au-Cu** and **Au<sub>3</sub>Cd** (Fig. S26). We performed the photocurrent response tests in a 0.1 M KCl aqueous solution through a typical three-electrode system keeping the bias voltage at 0.3 V (Ag/AgCl as the reference electrode, Pt wire as the assisting electrode, glassy carbon electrode as the working electrode). Upon switching on/off Xe lamp (intervals of 10 s;  $\lambda > 420$  nm; 300 W), the photocurrent density reversibly increases and decreases correspondingly, indicating a good generation and separation efficiency of photoinduced electron/hole pairs. The photocurrent response has good reproducibility.

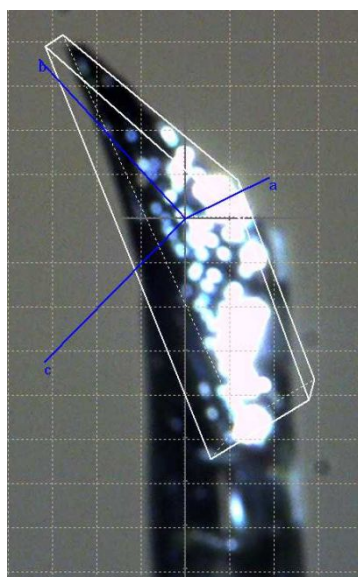

**Figure S26.** Determination of the coordinate axis of the *R*-Au-Cu crystal.

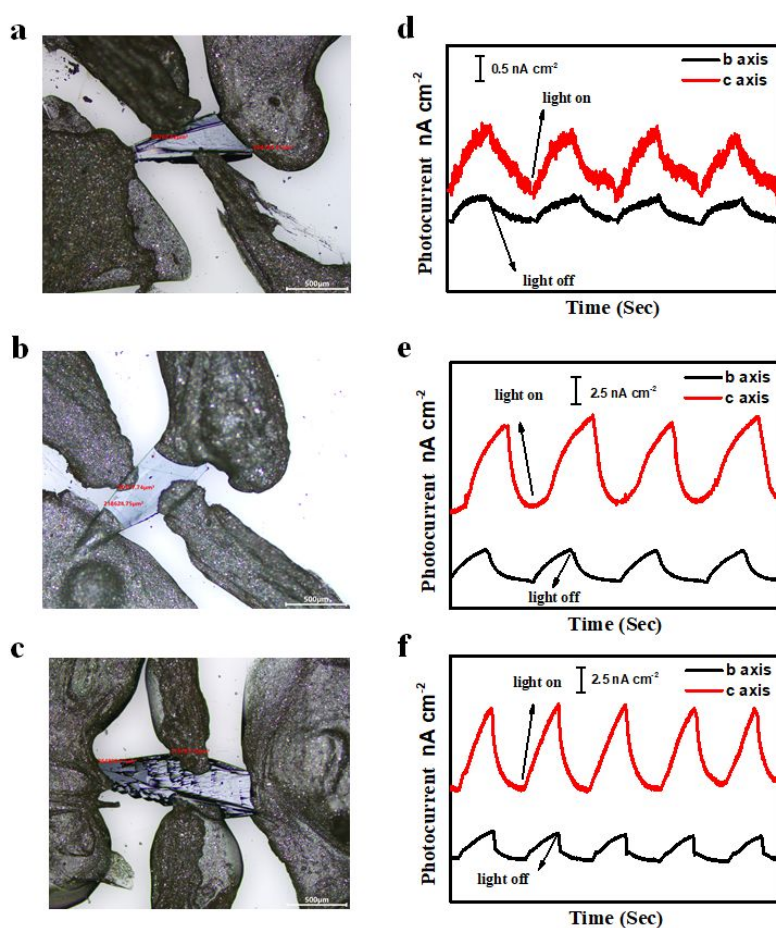

**Figure S27.** (a-c) Configurations of single-crystals in the measurement system for *R*-Au-Cu and (d-f) *R*-Au-Cu single-crystal device under dark and 450 nm light illumination with a power density of 1 mW/cm<sup>2</sup> at 5 V bias.

We test the anisotropic photoelectric response by using three single crystals of **R-Au-Cu**, which is enough large for operation. When switching on/off the laser (bias voltage at 5 V; intervals of 10 s;  $\lambda = 450$  nm), the photocurrent density reversibly increases and decreases correspondingly, indicating a good generation and separation efficiency of photoinduced electron/hole pairs. We observe that the photocurrent densities along the *c*-axis for these three single-crystal devices are 2.7, 2.9, and 3.1 times higher than those along the *b*-axis, respectively. Considering that the inter-cluster spacing along the *c*-axis is 1.61 nm, which is smaller than the 2.68 nm along the *b*-axis, and the dipole interactions are inversely proportional to the cube of cluster spacing,<sup>13</sup> we tentatively ascribed the anisotropic photo-electronic response to the distinct dipole interactions along the different direction.



**Table S1.** Crystal data and structure refinement of **Racemate Au-Cu**, **R-Au-Cu**, **S-Au-Cu**, and **Au<sub>3</sub>Cd** nanoclusters.

| Identification code                                          | <b>Racemate Au-Cu</b>                                                                                             | <b>R-Au-Cu</b>                                                                                                                     | <b>S-Au-Cu</b>                                                                                                | <b>Au<sub>3</sub>Cd</b>                                                                           |
|--------------------------------------------------------------|-------------------------------------------------------------------------------------------------------------------|------------------------------------------------------------------------------------------------------------------------------------|---------------------------------------------------------------------------------------------------------------|---------------------------------------------------------------------------------------------------|
| Empirical formula                                            | C <sub>120.5</sub> H <sub>91</sub> Au <sub>8</sub> ClCu <sub>4</sub> N <sub>6</sub> P <sub>6</sub> S <sub>6</sub> | C <sub>291</sub> H <sub>198</sub> Au <sub>16</sub> Cl <sub>6</sub> Cu <sub>8</sub> N <sub>12</sub> P <sub>12</sub> S <sub>12</sub> | C <sub>144</sub> H <sub>96</sub> Au <sub>8</sub> Cu <sub>4</sub> N <sub>6</sub> P <sub>6</sub> S <sub>6</sub> | C <sub>80</sub> H <sub>70</sub> Au <sub>3</sub> CdClN <sub>2</sub> OP <sub>6</sub> S <sub>2</sub> |
| CCDC                                                         | 2151533                                                                                                           | 2151535                                                                                                                            | 2151534                                                                                                       | 2151532                                                                                           |
| Formula weight                                               | 3866.51                                                                                                           | 8491.45                                                                                                                            | 4118.33                                                                                                       | 2064.07                                                                                           |
| Temperature/K                                                | 200.00(10)                                                                                                        | 100.00(10)                                                                                                                         | 200.00(10)                                                                                                    | 200.00(10)                                                                                        |
| Crystal system                                               | monoclinic                                                                                                        | monoclinic                                                                                                                         | monoclinic                                                                                                    | orthorhombic                                                                                      |
| Space group                                                  | <i>Pn</i>                                                                                                         | <i>P2</i> <sub>1</sub>                                                                                                             | <i>P2</i> <sub>1</sub>                                                                                        | <i>Pbca</i>                                                                                       |
| <i>a</i> /Å                                                  | 17.27050(10)                                                                                                      | 16.57420(10)                                                                                                                       | 16.6336(2)                                                                                                    | 22.9702(2)                                                                                        |
| <i>b</i> /Å                                                  | 16.42320(10)                                                                                                      | 26.81340(10)                                                                                                                       | 26.8950(3)                                                                                                    | 23.8042(2)                                                                                        |
| <i>c</i> /Å                                                  | 22.28820(10)                                                                                                      | 31.74440(10)                                                                                                                       | 31.7629(4)                                                                                                    | 27.0023(3)                                                                                        |
| <i>α</i> /°                                                  | 90                                                                                                                | 90                                                                                                                                 | 90                                                                                                            | 90                                                                                                |
| <i>β</i> /°                                                  | 99.25                                                                                                             | 91.4170(10)                                                                                                                        | 91.3460(10)                                                                                                   | 90                                                                                                |
| <i>γ</i> /°                                                  | 90                                                                                                                | 90                                                                                                                                 | 90                                                                                                            | 90                                                                                                |
| <i>V</i> /Å <sup>3</sup>                                     | 6239.57(6)                                                                                                        | 14103.24(11)                                                                                                                       | 14205.6(3)                                                                                                    | 14764.5(2)                                                                                        |
| <i>Z</i>                                                     | 2                                                                                                                 | 2                                                                                                                                  | 4                                                                                                             | 8                                                                                                 |
| $\rho_{\text{calc}}$ /cm <sup>3</sup>                        | 2.058                                                                                                             | 2.000                                                                                                                              | 1.926                                                                                                         | 1.857                                                                                             |
| $\mu$ /mm <sup>-1</sup>                                      | 20.141                                                                                                            | 18.239                                                                                                                             | 17.577                                                                                                        | 15.689                                                                                            |
| <i>F</i> (000)                                               | 3614.0                                                                                                            | 7996.0                                                                                                                             | 7744.0                                                                                                        | 7968.0                                                                                            |
| Crystal size/mm <sup>3</sup>                                 | 0.15 × 0.15 × 0.1                                                                                                 | 0.2 × 0.2 × 0.12                                                                                                                   | 0.2 × 0.12 × 0.12                                                                                             | 0.2 × 0.2 × 0.15                                                                                  |
| Radiation                                                    | CuK $\alpha$ ( $\lambda$ = 1.54184)                                                                               | CuK $\alpha$ ( $\lambda$ = 1.54184)                                                                                                | CuK $\alpha$ ( $\lambda$ = 1.54184)                                                                           | CuK $\alpha$ ( $\lambda$ = 1.54184)                                                               |
| 2 $\theta$ range for data collection /°                      | 5.382 to 148.218                                                                                                  | 5.57 to 147.55                                                                                                                     | 5.314 to 148.254                                                                                              | 6.27 to 148.768                                                                                   |
| Index ranges                                                 | -21 ≤ <i>h</i> ≤ 18,<br>-20 ≤ <i>k</i> ≤ 19,<br>-27 ≤ <i>l</i> ≤ 27                                               | -20 ≤ <i>h</i> ≤ 18,<br>-31 ≤ <i>k</i> ≤ 33,<br>-38 ≤ <i>l</i> ≤ 39                                                                | -20 ≤ <i>h</i> ≤ 11,<br>-33 ≤ <i>k</i> ≤ 32,<br>-39 ≤ <i>l</i> ≤ 37                                           | -28 ≤ <i>h</i> ≤ 26,<br>-27 ≤ <i>k</i> ≤ 29,<br>-32 ≤ <i>l</i> ≤ 31                               |
| Reflections collected                                        | 76273                                                                                                             | 160012                                                                                                                             | 123404                                                                                                        | 53723                                                                                             |
| Independent reflections                                      | 19719<br>[ <i>R</i> <sub>int</sub> = 0.0394,<br><i>R</i> <sub>sigma</sub> = 0.0356]                               | 54572<br>[ <i>R</i> <sub>int</sub> = 0.0481,<br><i>R</i> <sub>sigma</sub> = 0.0494]                                                | 53322<br>[ <i>R</i> <sub>int</sub> = 0.0688,<br><i>R</i> <sub>sigma</sub> = 0.0908]                           | 14686<br>[ <i>R</i> <sub>int</sub> = 0.0481,<br><i>R</i> <sub>sigma</sub> = 0.0426]               |
| Data/restraints/parameters                                   | 19719/476/1552                                                                                                    | 54572/313/3190                                                                                                                     | 53322/651/3121                                                                                                | 14686/214/959                                                                                     |
| Goodness-of-fit on <i>F</i> <sup>2</sup>                     | 1.073                                                                                                             | 1.051                                                                                                                              | 1.043                                                                                                         | 1.029                                                                                             |
| Final <i>R</i> indexes [ <i>I</i> ≥ 2 $\sigma$ ( <i>I</i> )] | <i>R</i> <sub>1</sub> = 0.0351,<br><i>wR</i> <sub>2</sub> = 0.0900                                                | <i>R</i> <sub>1</sub> = 0.0519,<br><i>wR</i> <sub>2</sub> = 0.1399                                                                 | <i>R</i> <sub>1</sub> = 0.0808,<br><i>wR</i> <sub>2</sub> = 0.2088                                            | <i>R</i> <sub>1</sub> = 0.0554,<br><i>wR</i> <sub>2</sub> = 0.1433                                |
| Final <i>R</i> indexes [all data]                            | <i>R</i> <sub>1</sub> = 0.0365,<br><i>wR</i> <sub>2</sub> = 0.0911                                                | <i>R</i> <sub>1</sub> = 0.0541,<br><i>wR</i> <sub>2</sub> = 0.1416                                                                 | <i>R</i> <sub>1</sub> = 0.0994,<br><i>wR</i> <sub>2</sub> = 0.2239                                            | <i>R</i> <sub>1</sub> = 0.0688,<br><i>wR</i> <sub>2</sub> = 0.1551                                |
| Largest diff. peak/hole / e Å <sup>-3</sup>                  | 1.51/-2.49                                                                                                        | 3.54/-2.89                                                                                                                         | 5.75/-2.52                                                                                                    | 3.58/-1.61                                                                                        |
| Flack parameter                                              | -0.019(4)                                                                                                         | -0.010(3)                                                                                                                          | -0.019(7)                                                                                                     |                                                                                                   |

**Table S2.** The Au-Cu bond length (Å) in the interface of *R-1* and *R-Au-Cu*.

| <i>R-1</i> |            | <i>R-Au-Cu</i> |          |
|------------|------------|----------------|----------|
| Au6-Cu1    | 2.7279(19) | Au6-Cu1        | 2.693(3) |
| Au2-Cu1    | 2.742(2)   | Au2-Cu1        | 2.614(3) |
| Au1-Cu1    | 2.6191(19) | Au1-Cu1        | 2.687(3) |
| Au7-Cu1    | 2.6196(19) | Au7-Cu1        | 2.662(3) |
| Au5-Cu2    | 2.577(2)   | Au5-Cu2        | 2.630(3) |
| Au7-Cu2    | 2.706(2)   | Au7-Cu2        | 2.522(3) |
| Au6-Cu2    | 2.6955(19) | Au6-Cu2        | 2.647(3) |
| Au4-Cu2    | 2.769(2)   | None           | None     |

**Table S3** Comparison of bond angles (°) of the Cu<sub>4</sub>Au<sub>8</sub> core in *R-1* and *R-Au-Cu*.

|           |            |           |           |
|-----------|------------|-----------|-----------|
| Au6Au1Au2 | 106.20(2)  | None      | None      |
| Au7Au5Au6 | 57.323(19) | Au6Au5Au7 | 56.95(2)  |
| Au7Au1Au2 | 56.970(17) | Au2Au1Au7 | 60.39(2)  |
| Au7Au1Au6 | 56.828(18) | None      | None      |
| Au7Au5Au4 | 56.161(18) | Au4Au5Au7 | 57.07(2)  |
| Cu1Au1Au2 | 60.08(4)   | Cu1Au1Au2 | 57.62(6)  |
| Cu1Au1Au6 | 59.78(4)   | None      | None      |
| Cu1Au1Au7 | 57.98(4)   | Cu1Au1Au7 | 58.70(6)  |
| Au1Au2Au3 | 117.35(2)  | Au1Au2Au3 | 100.77(3) |
| Au1Au2Au8 | 93.64(2)   | None      | None      |
| Au3Au2Au8 | 54.237(17) | None      | None      |
| Au7Au2Au1 | 60.281(19) | Au1Au2Au7 | 59.94(2)  |
| Au7Au2Au3 | 57.128(17) | Au7Au2Au3 | 59.57(2)  |
| Au7Au2Au8 | 57.115(19) | None      | None      |
| Au7Au2Cu1 | 57.75(4)   | Cu1Au2Au7 | 59.37(6)  |
| Cu1Au2Au1 | 55.89(4)   | Cu1Au2Au1 | 60.25(6)  |
| Cu1Au2Au3 | 87.93(4)   | Cu1Au2Au3 | 116.77(6) |
| Cu1Au2Au8 | 114.79(4)  | None      | None      |
| Au2Au3Au4 | 106.68(2)  | Au2Au3Au4 | 118.35(3) |
| Au4Au7Au6 | 116.32(3)  | Au6Au7Au4 | 120.29(3) |

|           |            |           |           |
|-----------|------------|-----------|-----------|
| Au7Au3Au2 | 56.722(17) | Au7Au3Au2 | 59.73(2)  |
| Au6Au7Au2 | 116.15(2)  | Au6Au7Au2 | 117.08(3) |
| Au7Au3Au4 | 54.954(17) | Au7Au3Au4 | 58.73(2)  |
| Au8Au3Au2 | 63.619(19) | Au8Au3Au2 | 89.28(3)  |
| Au8Au3Au4 | 62.52(2)   | Au8Au3Au4 | 62.13(3)  |
| Au4Au7Au2 | 127.46(2)  | Au4Au7Au2 | 122.03(3) |
| Au8Au3Au7 | 60.53(2)   | Au8Au3Au7 | 58.72(2)  |
| Au4Au7Au1 | 151.91(3)  | Au4Au7Au1 | 137.85(3) |
| Au5Au4Au3 | 115.00(2)  | Au3Au4Au5 | 121.71(3) |
| Au2Au7Au5 | 149.05(3)  | Au2Au7Au5 | 173.80(3) |
| Au5Au4Au8 | 91.37(2)   | Au8Au4Au5 | 92.84(3)  |
| Au7Au4Au3 | 55.868(17) | Au7Au4Au3 | 59.81(2)  |
| Au7Au4Au5 | 59.132(19) | Au7Au4Au5 | 61.94(2)  |
| Au6Au7Au8 | 153.91(3)  | Au8Au7Au6 | 125.10(3) |
| Au7Au4Au8 | 57.031(19) | Au7Au4Au8 | 57.40(2)  |
| Au4Au7Au8 | 67.54(2)   | Au8Au7Au4 | 63.43(3)  |
| Au7Au4Cu2 | 59.71(4)   | None      | None      |
| Au2Au7Au8 | 66.84(2)   | Au8Au7Au2 | 90.33(3)  |
| Au8Au4Au3 | 53.005(17) | Au3Au4Au8 | 57.14(2)  |
| Au8Au7Au1 | 101.12(2)  | Au8Au7Au1 | 74.65(3)  |
| Au8Au7Au5 | 100.87(3)  | Au8Au7Au5 | 95.85(3)  |
| Cu2Au4Au3 | 92.19(4)   | None      | None      |
| Au5Au7Au1 | 94.13(2)   | Au1Au7Au5 | 122.48(3) |
| Cu2Au4Au5 | 54.00(4)   | None      | None      |
| Cu2Au4Au8 | 116.72(4)  | None      | None      |
| Au6Au5Au4 | 104.88(2)  | Au6Au5Au4 | 113.96(3) |
| Au6Au7Cu2 | 60.12(4)   | Cu2Au7Au6 | 61.16(6)  |
| Cu2Au5Au4 | 60.39(4)   | Cu2Au5Au4 | 81.41(6)  |
| Au4Au7Cu2 | 62.06(4)   | Cu2Au7Au4 | 85.68(7)  |
| Cu2Au5Au6 | 59.72(4)   | Cu2Au5Au6 | 58.94(6)  |
| Au2Au7Cu2 | 153.13(5)  | Cu2Au7Au2 | 115.95(7) |
| Cu2Au5Au7 | 60.91(4)   | Cu2Au5Au7 | 54.49(6)  |
| Au1Au6Cu3 | 115.28(4)  | None      | None      |
| Au2Au7Au1 | 62.748(19) | Au1Au7Au2 | 59.67(2)  |

|           |            |           |           |
|-----------|------------|-----------|-----------|
| Au5Au6Au1 | 91.34(3)   | None      | None      |
| Cu1Au7Cu2 | 97.06(6)   | Cu2Au7Cu1 | 79.44(9)  |
| Au5Au6Cu3 | 112.23(5)  | Au5Au6Cu3 | 109.20(6) |
| Cu1Au7Au5 | 124.56(5)  | Cu1Au7Au5 | 117.58(6) |
| Au7Au6Au1 | 60.398(19) | None      | None      |
| Cu1Au7Au3 | 95.78(4)   | Cu1Au7Au3 | 116.20(6) |
| Au7Au6Au5 | 60.08(2)   | Au7Au6Au5 | 63.70(2)  |
| Cu1Au7Au6 | 62.02(4)   | Cu1Au7Au6 | 60.62(6)  |
| Au7Au6Cu1 | 58.00(4)   | Au7Au6Cu1 | 59.46(6)  |
| Au7Au6Cu2 | 60.53(4)   | Cu2Au6Au7 | 56.58(6)  |
| Au7Au6Cu3 | 80.47(4)   | Au7Au6Cu3 | 94.12(6)  |
| Au7Au6Cu4 | 119.38(5)  | Au7Au6Cu4 | 120.01(6) |
| Cu1Au7Au4 | 149.13(5)  | Cu1Au7Au4 | 161.87(7) |
| Cu1Au7Au2 | 62.27(5)   | Cu1Au7Au2 | 57.66(6)  |
| Cu1Au7Au8 | 129.01(5)  | Cu1Au7Au8 | 132.71(7) |
| Cu1Au7Au1 | 57.96(4)   | Cu1Au7Au1 | 59.60(6)  |
| Cu4Au6Cu1 | 62.40(6)   | Cu1Au6Cu4 | 60.69(8)  |
| Cu1Au6Au1 | 56.06(4)   | None      | None      |
| Cu1Au6Au5 | 118.03(4)  | Cu1Au6Au5 | 120.60(6) |
| Cu1Au6Cu3 | 59.70(6)   | Cu1Au6Cu3 | 60.96(8)  |
| Cu2Au6Au1 | 120.80(5)  | None      | None      |
| Cu2Au6Au5 | 55.64(5)   | Cu2Au6Au5 | 58.36(6)  |
| Cu2Au6Cu1 | 94.76(6)   | Cu2Au6Cu1 | 76.72(8)  |
| Cu2Au6Cu3 | 57.25(6)   | Cu2Au6Cu3 | 54.22(8)  |
| Cu2Au6Cu4 | 116.70(7)  | Cu2Au6Cu4 | 112.32(9) |
| Cu4Au6Au1 | 94.96(5)   | None      | None      |
| Cu4Au6Au5 | 172.08(5)  | Cu4Au6Au5 | 167.35(7) |
| Cu4Au6Cu3 | 60.61(6)   | Cu4Au6Cu3 | 59.47(8)  |
| Au2Au7Au3 | 66.149(19) | None      | None      |
| Au3Au7Au1 | 128.82(3)  | Au1Au7Au3 | 101.37(3) |
| Au3Au7Au5 | 133.88(2)  | Au3Au7Au5 | 122.42(3) |
| Au3Au7Au8 | 59.705(19) | Au8Au7Au3 | 59.55(2)  |
| Au3Au7Cu2 | 101.81(4)  | Cu2Au7Au3 | 115.51(6) |
| Au4Au7Au3 | 69.178(19) | Au4Au7Au3 | 61.46(2)  |

|           |            |           |            |
|-----------|------------|-----------|------------|
| Au4Au7Au5 | 64.71(2)   | Au4Au7Au5 | 61.00(2)   |
| None      | None       | Au3Au8Au1 | 90.14(3)   |
| Au6Au7Au1 | 62.77(2)   | Au6Au7Au1 | 80.13(3)   |
| Au3Au8Au7 | 59.760(19) | Au7Au8Au3 | 61.73(2)   |
| Au6Au7Au3 | 146.35(3)  | Au6Au7Au3 | 175.30(4)  |
| Au6Au7Au5 | 62.60(2)   | Au6Au7Au5 | 59.36(2)   |
| None      | None       | Au7Au8Au1 | 53.70(2)   |
| None      | None       | Au4Au8Au1 | 112.73(3)  |
| None      | None       | Au7Au1Au8 | 51.65(2)   |
| None      | None       | Au2Au1Au8 | 78.91(2)   |
| None      | None       | Cu1Au1Au8 | 109.40(6)  |
| Au5Cu2Au7 | 62.78(5)   | Au7Cu2Au5 | 67.41(6)   |
| Au6Cu2Au7 | 59.35(4)   | Au7Cu2Au6 | 62.27(6)   |
| Au7Cu2Cu3 | 85.00(7)   | Au7Cu2Cu3 | 109.26(12) |
| Au5Cu2Cu3 | 131.03(9)  | Cu3Cu2Au5 | 128.14(12) |
| Cu2Au7Au1 | 122.76(4)  | Cu2Au7Au1 | 134.15(7)  |
| Au6Cu2Cu3 | 67.36(6)   | Cu3Cu2Au6 | 70.49(9)   |
| Cu2Au7Au5 | 56.31(5)   | Cu2Au7Au5 | 58.10(6)   |
| Cu2Au7Au8 | 129.59(5)  | Cu2Au7Au8 | 147.55(7)  |
| Au2Au8Au4 | 107.01(2)  | None      | None       |
| Au3Au8Au2 | 62.144(19) | None      | None       |
| Au3Au8Au4 | 64.47(2)   | Au3Au8Au4 | 60.72(2)   |
| Au7Au8Au2 | 56.041(18) | None      | None       |
| Au7Au8Au4 | 55.424(19) | Au7Au8Au4 | 59.17(2)   |
| Cu1Cu3Cu4 | 58.27(7)   | Cu4Cu3Cu1 | 56.56(9)   |
| Au1Cu1Au2 | 64.03(5)   | Au2Cu1Au1 | 62.13(6)   |
| Au1Cu1Au6 | 64.16(4)   | Au1Cu1Au6 | 80.81(8)   |
| Au1Cu1Au7 | 64.05(4)   | Au7Cu1Au1 | 61.70(6)   |
| Au1Cu1Cu3 | 128.76(8)  | Au1Cu1Cu3 | 146.02(12) |
| Au1Cu1Cu4 | 97.48(7)   | Au1Cu1Cu4 | 105.08(11) |
| Au6Cu1Cu4 | 58.28(6)   | Au6Cu1Cu4 | 60.54(8)   |
| Au2Cu1Cu3 | 132.78(8)  | Au2Cu1Cu3 | 134.48(11) |
| Au6Cu1Cu3 | 65.25(6)   | Au6Cu1Cu3 | 65.30(8)   |
| Au2Cu1Cu4 | 161.06(9)  | Au2Cu1Cu4 | 164.59(13) |

|           |           |           |            |
|-----------|-----------|-----------|------------|
| Au6Cu1Au2 | 112.45(7) | Au2Cu1Au6 | 121.57(10) |
| Au7Cu1Au2 | 59.98(4)  | Au2Cu1Au7 | 62.97(6)   |
| Au7Cu1Au6 | 59.98(4)  | Au7Cu1Au6 | 59.92(6)   |
| Au7Cu1Cu3 | 84.25(7)  | Au7Cu1Cu3 | 97.07(10)  |
| Au7Cu1Cu4 | 117.28(8) | Au7Cu1Cu4 | 120.33(11) |
| Cu4Cu1Cu3 | 61.34(7)  | Cu4Cu1Cu3 | 60.92(9)   |
| Au5Cu2Au6 | 64.65(5)  | Au5Cu2Au6 | 62.70(6)   |
| Au6Cu2Au4 | 112.20(7) | None      | None       |
| Au7Cu2Au4 | 58.23(4)  | None      | None       |
| Cu3Cu2Au4 | 127.99(8) | None      | None       |
| Cu1Cu3Au6 | 55.05(6)  | Cu1Cu3Au6 | 53.74(7)   |
| Cu2Cu3Au6 | 55.40(6)  | Cu2Cu3Au6 | 55.29(8)   |
| Cu2Cu3Cu1 | 90.31(9)  | Cu2Cu3Cu1 | 73.37(10)  |
| Cu2Cu3Cu4 | 108.56(9) | Cu2Cu3Cu4 | 109.20(12) |
| Cu4Cu3Au6 | 54.16(6)  | Cu4Cu3Au6 | 55.21(8)   |
| Au6Cu4Cu1 | 59.31(6)  | Au6Cu4Cu1 | 58.76(8)   |
| Au6Cu4Cu3 | 65.23(6)  | Au6Cu4Cu3 | 65.32(8)   |
| Cu1Cu4Cu3 | 60.39(7)  | Cu1Cu4Cu3 | 62.52(10)  |

**Table S4** The absorptions of **racemate Au-Cu (*R*)** cluster calculated according to TDDFT method (H = HOMO, L = LUMO).

| Wavelength (nm) | Osc. Strength | Major contribs                                 |
|-----------------|---------------|------------------------------------------------|
| 608.925         | 0.03          | H->L (93%)                                     |
| 583.478         | 0.0172        | H-1->L (88%)                                   |
| 452.213         | 0.0534        | H-1->L+2 (21%), H-1->L+3 (23%)                 |
| 429.186         | 0.0943        | H-4->L+2 (25%), H-2->L+3 (14%), H-1->L+3 (21%) |
| 422.862         | 0.1019        | H-3->L+2 (42%), H-1->L+5 (29%)                 |
| 371.129         | 0.1177        | H-8->L (15%), H-7->L+2 (30%), H-1->L+6 (19%)   |

**Table S5** Absorptions of ***R*-Au-Cu** cluster calculated according to TDDFT method (H = HOMO, L = LUMO).

| Wavelength (nm) | Osc. Strength | Major contribs                           |
|-----------------|---------------|------------------------------------------|
| 598.895         | 0.04          | H->L (15%), H->L+1 (70%), H->L+2 (11%)   |
| 489.665         | 0.0418        | H-2->L (10%), H->L+4 (44%), H->L+6 (11%) |

|         |        |                                                                |
|---------|--------|----------------------------------------------------------------|
| 476.969 | 0.0513 | H-2->L+1 (34%), H->L+5 (20%)                                   |
| 474.087 | 0.0762 | H-2->L+1 (25%), H->L+5 (41%)                                   |
| 426.616 | 0.0765 | H-3->L+3 (11%), H-2->L+3 (10%), H-1->L+4 (21%), H-1->L+6 (19%) |
| 379.142 | 0.1734 | H-4->L+6 (38%)                                                 |

**Table S6.** Absorptions of  $\text{Au}_3\text{Cd}$  cluster calculated according to TDDFT method (H = HOMO, L = LUMO).

| Wavelength (nm) | Osc. Strength | Major contribs                               |
|-----------------|---------------|----------------------------------------------|
| 535.195         | 0.0128        | H-1->L (34%), H->L (63%)                     |
| 496.568         | 0.0283        | H-1->L (63%), H->L (34%)                     |
| 371.608         | 0.1203        | H-1->L+3 (82%)                               |
| 321.650         | 0.105         | H->L+17 (82%)                                |
| 259.254         | 0.0943        | H-10->L (13%), H-8->L (20%), H-2->L+19 (14%) |

## Reference:

- (1) CrysAlisPro 2012, Agilent Technologies. Version 1.171.36.31.
- (2) Sheldrick, G. M. *Acta Cryst. A* **2015**, *71*, 3-8.
- (3) Dolomanov, O. V.; Bourhis, L. J.; Gildea, R. J.; Howard, J. A. K.; Puschmann, H. *J. Appl. Cryst.* **2009**, *42*, 339-341.
- (4) Spek, A. L. *Acta Cryst. C* **2015**, *71*, 9-18.
- (5) Caprioli, F.; Decker, F.; Marrani, A. G.; Beccari, M.; Castro, V. D. *Phys. Chem. Chem. Phys.* **2010**, *12*, 9230–9238.
- (6) Frisch, M. J. et al. *Gaussian, Inc., Wallingford CT*, **2016**.
- (7) Perdew, J. P.; Burke, K.; Ernzerhof, M. *Phys. Rev. Lett.* **1996**, *77*, 3865.
- (8) a) Petersson, G. A.; Bennett, A.; Tensfeldt, T. G.; Al-Laham, M. A.; Shirley, W. A.; Mantzaris, J. *J. Chem. Phys.* **1988**, *89*, 2193. b) Petersson, G. A.; Al-Laham, M. A. *J. Chem. Phys.* **1991**, *94*, 6081.
- (9) a) Fuentealba, P.; Preuss, H.; Stoll, H.; Szentpály, L. V. *Chem. Phys. Lett.* **1982**, *89*, 418. b) Cao, X. Y. Dolg, M. *J. Chem. Phys.* **2001**, *115*, 7348.
- (10) Lu, T.; Chen, F. W. *J. Comput. Chem.* **2012**, *33*, 580.
- (11) Han, B.-L.; Liu, Z.; Feng, L.; Wang, Z.; Gupta, R. K.; Aikens, C. M.; Tung, C.-H.; Sun, D. Polymorphism in Atomically Precise Cu<sub>23</sub> Nanocluster Incorporating Tetrahedral [Cu<sub>4</sub>]<sup>0</sup> Kernel. *J. Am. Chem. Soc.* **2020**, *142*, 5834–5841.
- (12) Su, Y. M.; Wang, Z.; Schein, S.; Tung, C. H.; Sun, D. A Keplerian Ag<sub>90</sub> Nest of Platonic and Archimedean Polyhedra in Different Symmetry Groups. *Nat. Commun.* **2020**, *11*, 3316.
- (13) Lu, C.; Tang, Z. Advanced Inorganic Nanoarchitectures from Oriented Self-Assembly. *Adv. Mater.* **2016**, *28*, 1096–1108.
